# Supplementary material for: Design, synthesis, and anti-inflammatory evaluation of new isatin azo disperse dyes: computational studies, molecular docking, and printing performance on polyester fabrics
Source: Royal Society of Chemistry journal article supplement (doi:10.1039/d6ra01392a), 2026-05-05
Supplement: d6ra01392a1.pdf [file d6ra01392a1.pdf]

# Design, Synthesis, and Anti-inflammatory Evaluation of New Isatin Azo Disperse Dyes: Computational studies, Molecular Docking, and dyeing performance on Polyester Fabrics

Hend A. Hekal <sup>a\*</sup>, Elkhairy Shaban<sup>b\*</sup>, Zeinab A. Elshahid<sup>c</sup>, Hayam A. Abd El Salam<sup>d</sup>, Faten M. Atlam <sup>e</sup>,  
Ahmed A. Nosier <sup>a, f</sup>

<sup>a</sup> *Organic Chemistry, Chemistry Department, Faculty of Science, Tanta University, Tanta, 31527, Egypt.*

<sup>b</sup> *Dyeing, Printing and Textile Auxiliaries Department, Textile Research and Technology Institute, National Research Centre, Dokki, Giza 12622, Egypt.*

<sup>c</sup> *Chemistry of Natural and Microbial Products Department, Pharmaceutical Industry and Research Institute, National Research Centre, Giza, 12622, Egypt.*

<sup>d</sup> *Green Chemistry Department, National Research Centre, Dokki, Giza 12622, Egypt.*

<sup>e</sup> *Theoretical Applied Chemistry Unit (TACU), Chemistry Department, Faculty of Science, Tanta University, Tanta, 31527, Egypt.*

<sup>f</sup> *Alamal College for Specialized Medical Sciences, Karbala, 56001, Iraq.*

**Emails:** [hend.hekal@science.tanta.edu.eg](mailto:hend.hekal@science.tanta.edu.eg), [shaban\\_nrc@yahoo.com](mailto:shaban_nrc@yahoo.com), [dr.z.a.elshahid@gmail.com](mailto:dr.z.a.elshahid@gmail.com),  
[yooma\\_nrc82@yahoo.com](mailto:yooma_nrc82@yahoo.com), [faten.atlam@science.tanta.edu.eg](mailto:faten.atlam@science.tanta.edu.eg), and  
[ahmed.nosir@science.tanta.edu.eg](mailto:ahmed.nosir@science.tanta.edu.eg),

**Running title:** Isatin-based azo dyes and their applications.

**\*Corresponding and Proof:**

Prof. Dr. Hend A. Hekal

Chemistry Department

Faculty of Science

Tanta University

Tanta, Egypt

ORCID ID: 0000-0002-7536-9545

Email: [hend.hekal@science.tanta.edu.eg](mailto:hend.hekal@science.tanta.edu.eg)

Prof. Dr. Shabaan Elkhairy

Dyeing, Printing and Textile Auxiliaries Department,

Textile Research and Technology Institute,

National Research Centre, Dokki,

Giza 12622, Egypt.

Email: [shaban\\_nrc@yahoo.com](mailto:shaban_nrc@yahoo.com)

## Chemicals and Reagents

All reagents and starting material (1) were supplied by Sigma-Aldrich. For printing on polyester fabrics, an anionic acrylic polymer, specifically thickener EM-630, sourced from Guangdong EM Chemicals Technology Co., Ltd., served as the dye carrier. The pH of the printing paste was adjusted to 6 using acetic acid. Additionally, levegal MDL, an anionic dispersing agent from TANATEX Chemicals, was employed. El-Mahalla Company for Spinning and Weaving in El-Mahalla, Egypt, kindly provided 100% plain-weave polyester fabric (150 g/m<sup>2</sup>, 56 ends/cm, 34 picks/cm). Furthermore, the fabric was treated for 30 minutes at 80°C in an aqueous solution containing two grams per liter of nonionic detergent (Sera Wash M-RK, DyStar, Egypt) at a 50% liquor-to-goods ratio, followed by washing and air drying.

## Instruments and Methods

All <sup>1</sup>H- and <sup>13</sup>C-NMR spectra were recorded on a JEOL ECA500 FT NMR spectrometer at 500 MHz and 125 MHz, respectively, at the Spectral Analyses Unit, National Research Center, Dokki, Egypt. Dimethyl sulfoxide (DMSO-d<sub>6</sub>) was used as a solvent. Chemical shifts were expressed in  $\delta$  ppm relative to the position with respect to the solvent. Fourier transform infrared (FT-IR) spectra were recorded using a Thermo Fisher Nicolet IS10 at Spectral Analyses Unit, National Research Center, Dokki, Egypt. Electron impact ionization mass spectra (EI-MS) were obtained on a Thermo Scientific Trace 1310 Gas Chromatography-Mass Spectrometry at Cairo University, Egypt. UV/Vis absorption spectra for azo compounds were measured by a Hunter Lab Ultra Scan PRO spectrophotometer. The in vitro anti-inflammatory screening was carried out at Micro Analytical Center, National Research Centre, Dokki, Egypt. Melting points (m.p.) were measured and recorded by a Stuart Scientific melting point apparatus and were uncorrected. All synthesized products were detected by thin-layer chromatography (TLC) on Kiesel gel F254 precoated plates (Merck).

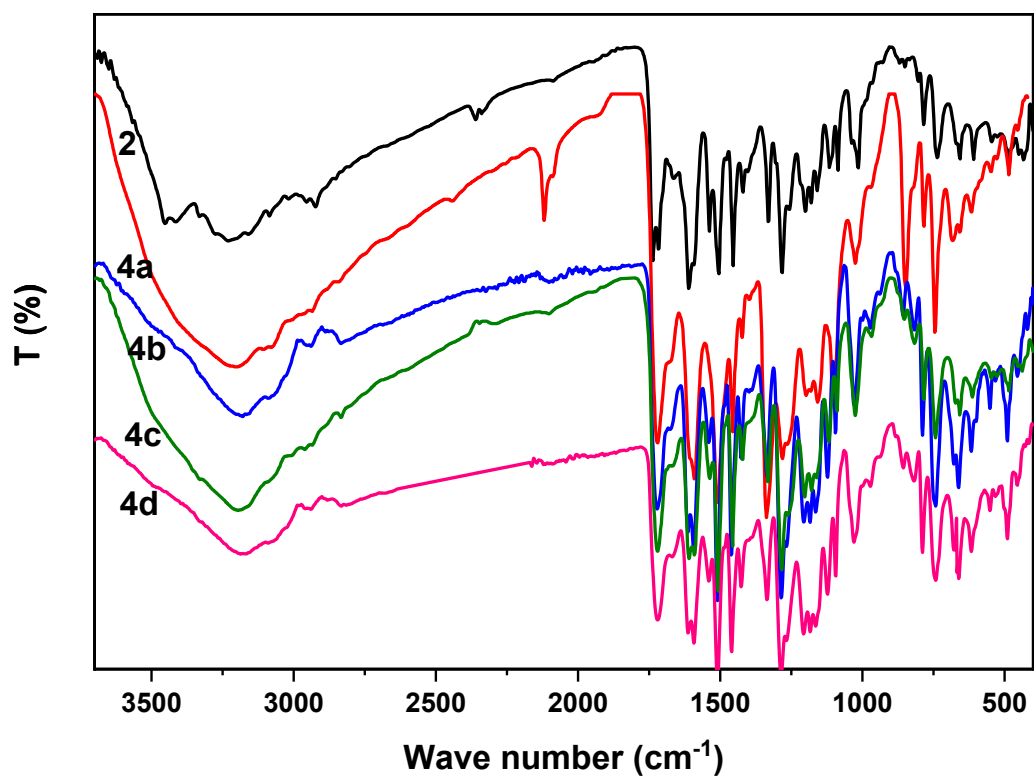

**Fig.S1.** FT-IR spectra of compounds **2** and **4a-d**.

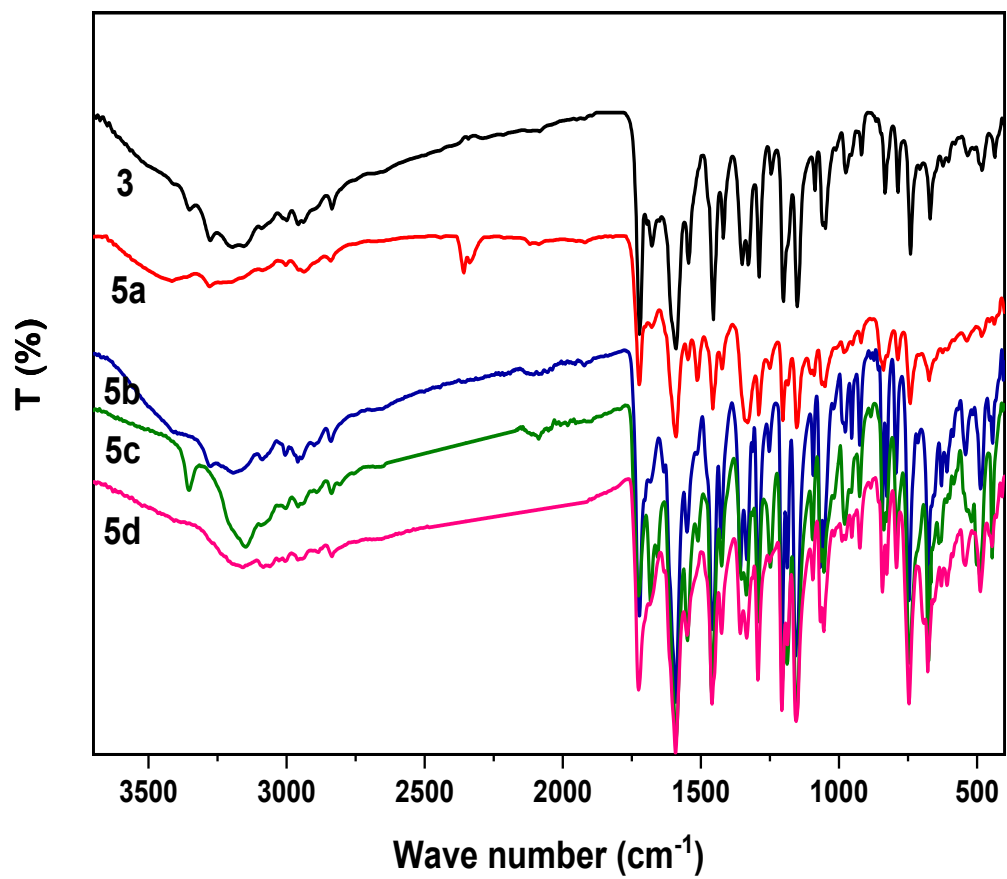

**Fig.S2.** FT-IR spectra of compounds **3** and **5a-d**.

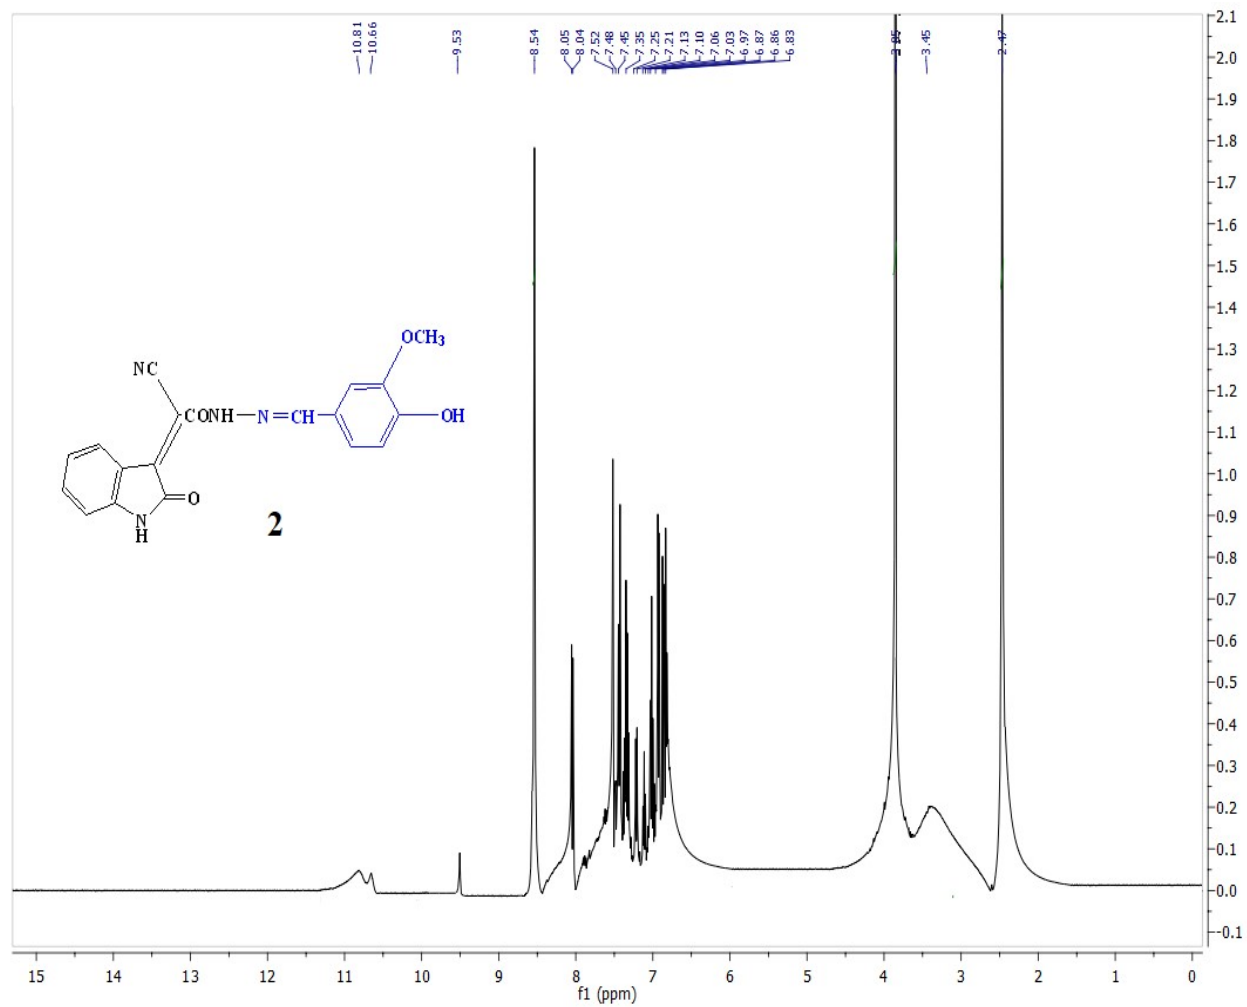

**Fig.S3.** <sup>1</sup>H-NMR spectra of compound 2.

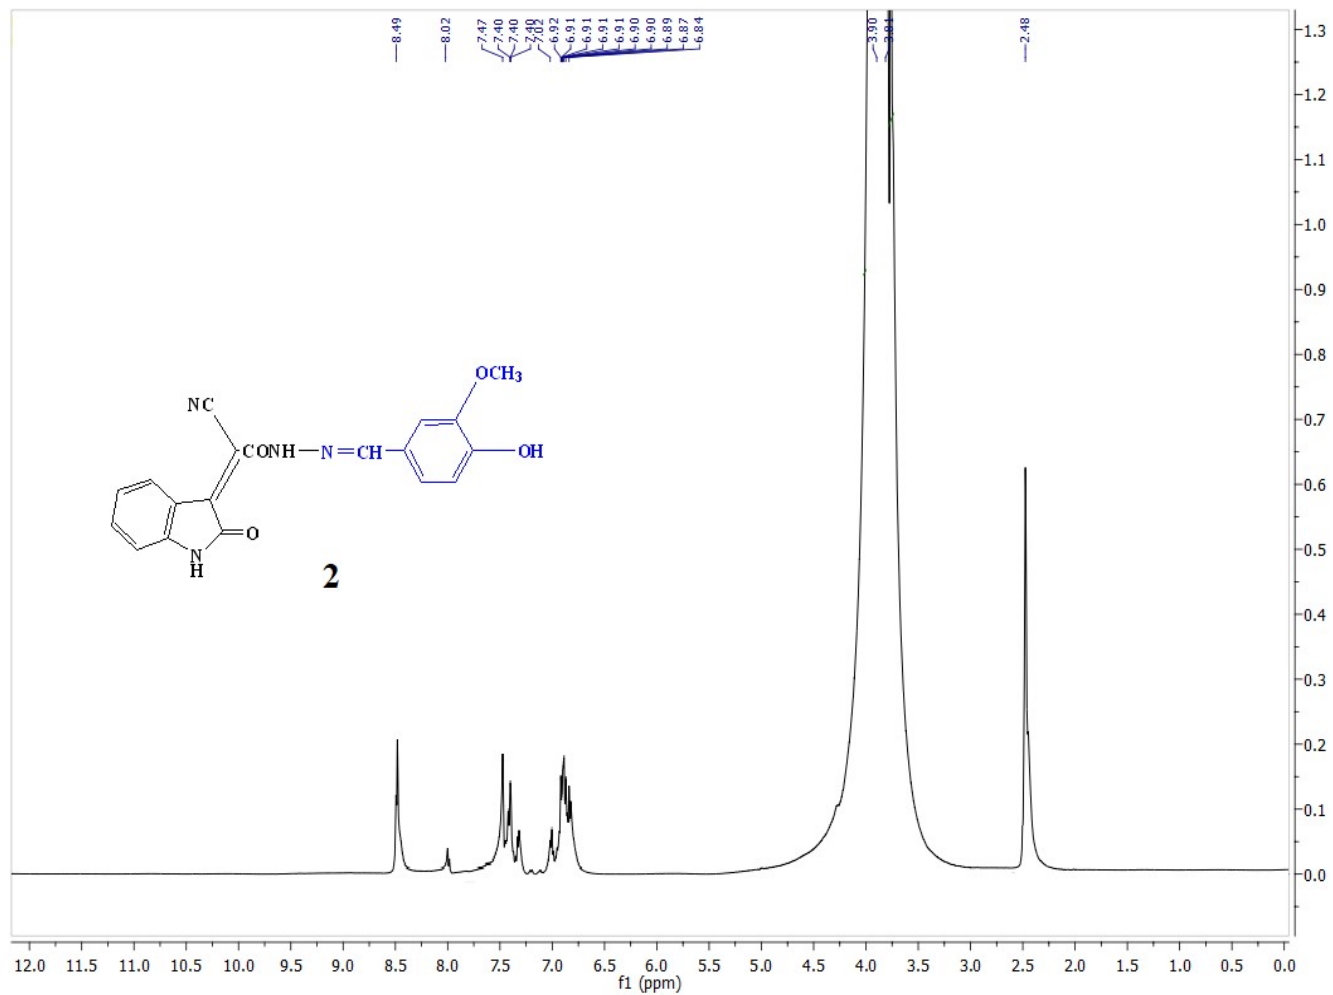

**Fig.S4.** D<sub>2</sub>O-<sup>1</sup>H-NMR spectra of compound 2.

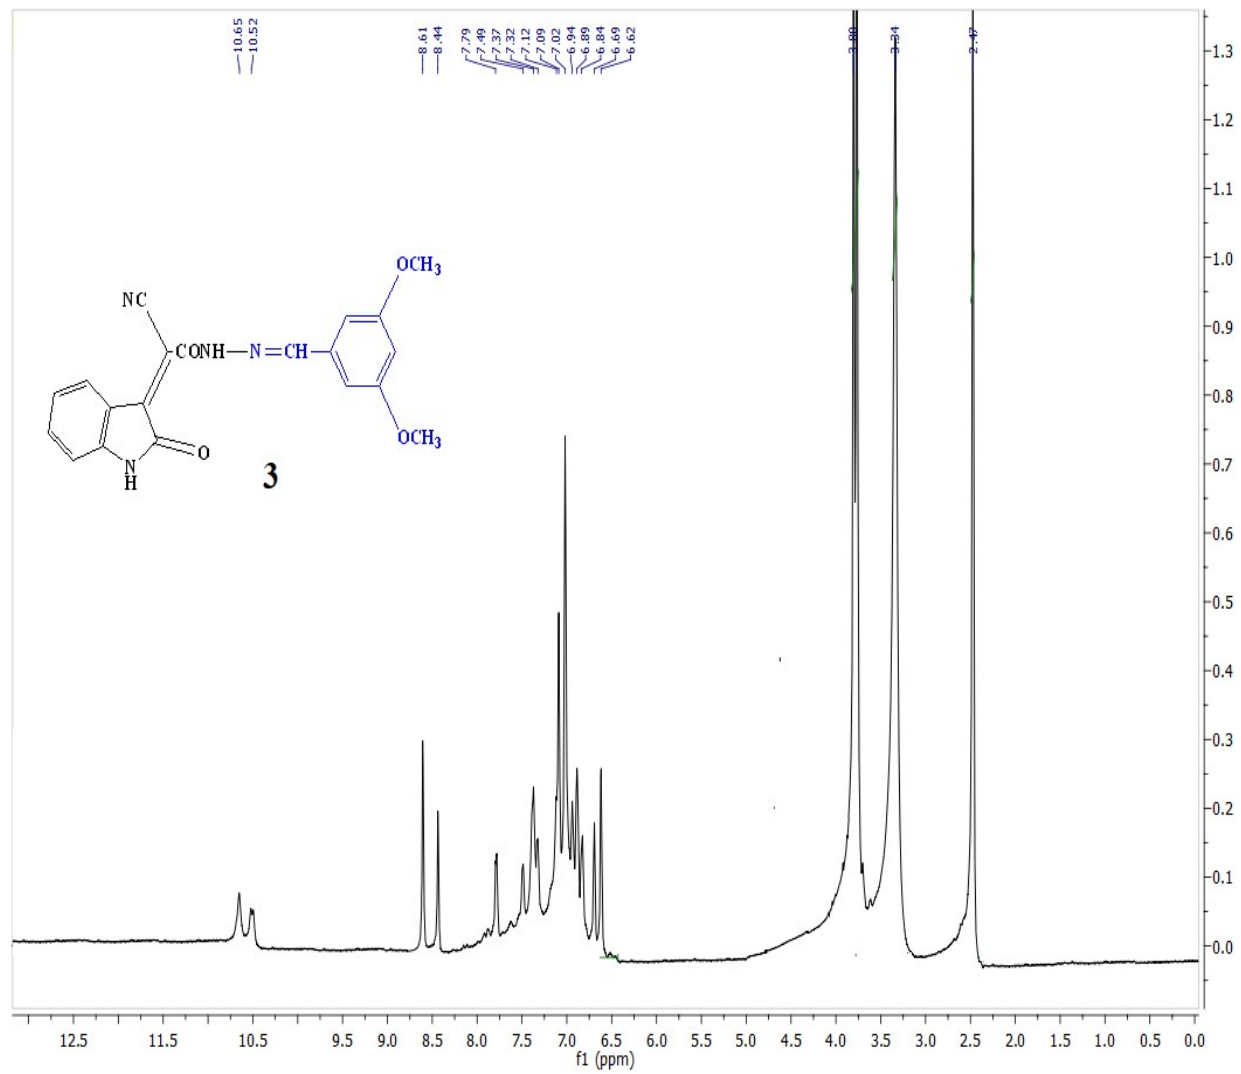

**Fig.S5.** <sup>1</sup>H-NMR spectra of compound 3.

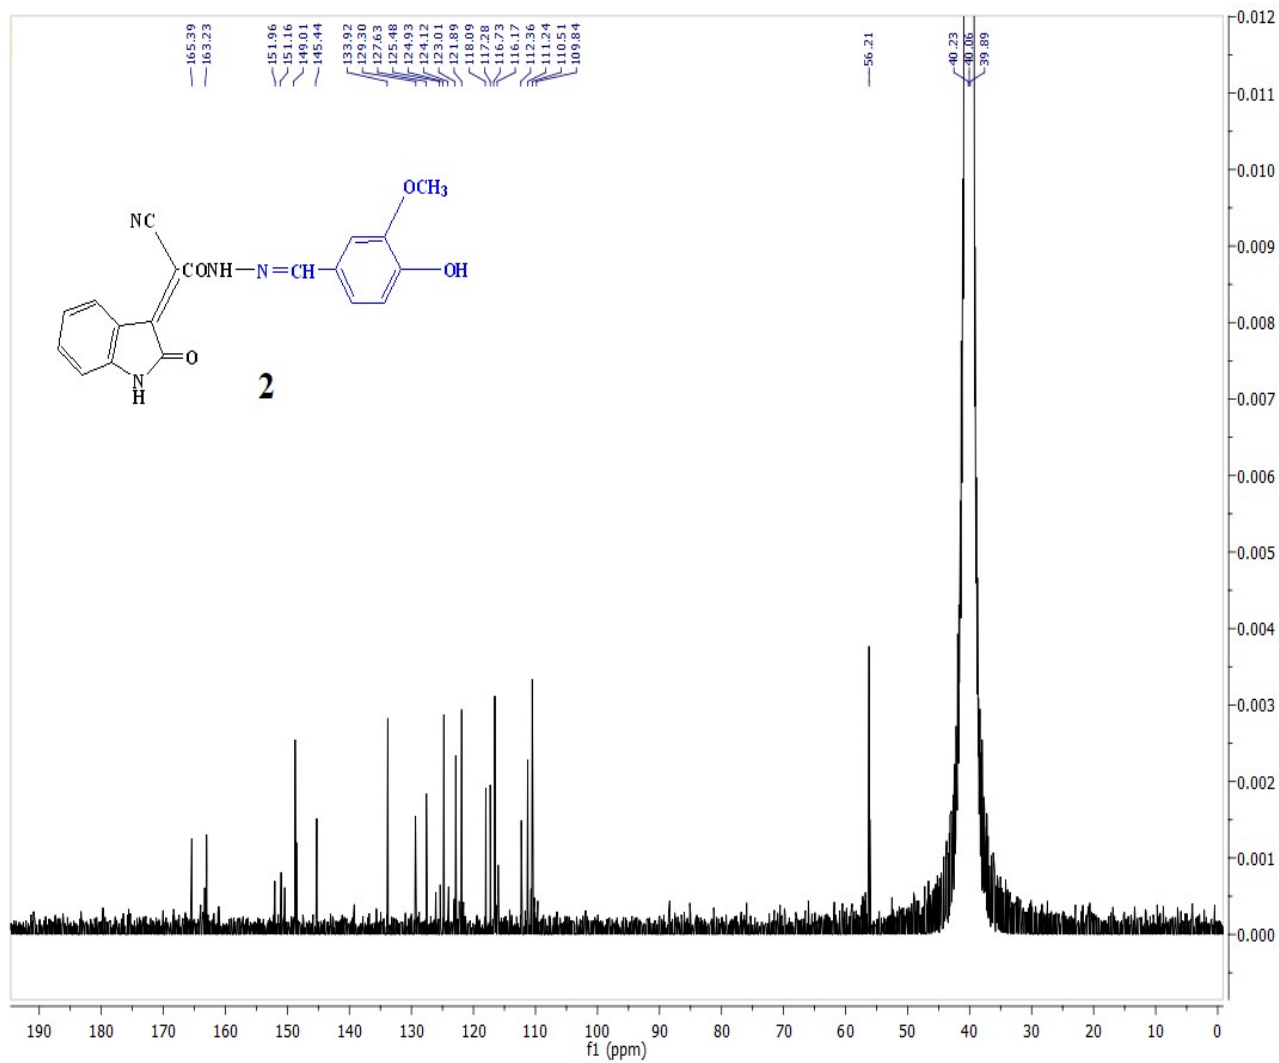

**Fig.S6.** <sup>13</sup>C-NMR spectra of compound **2**.

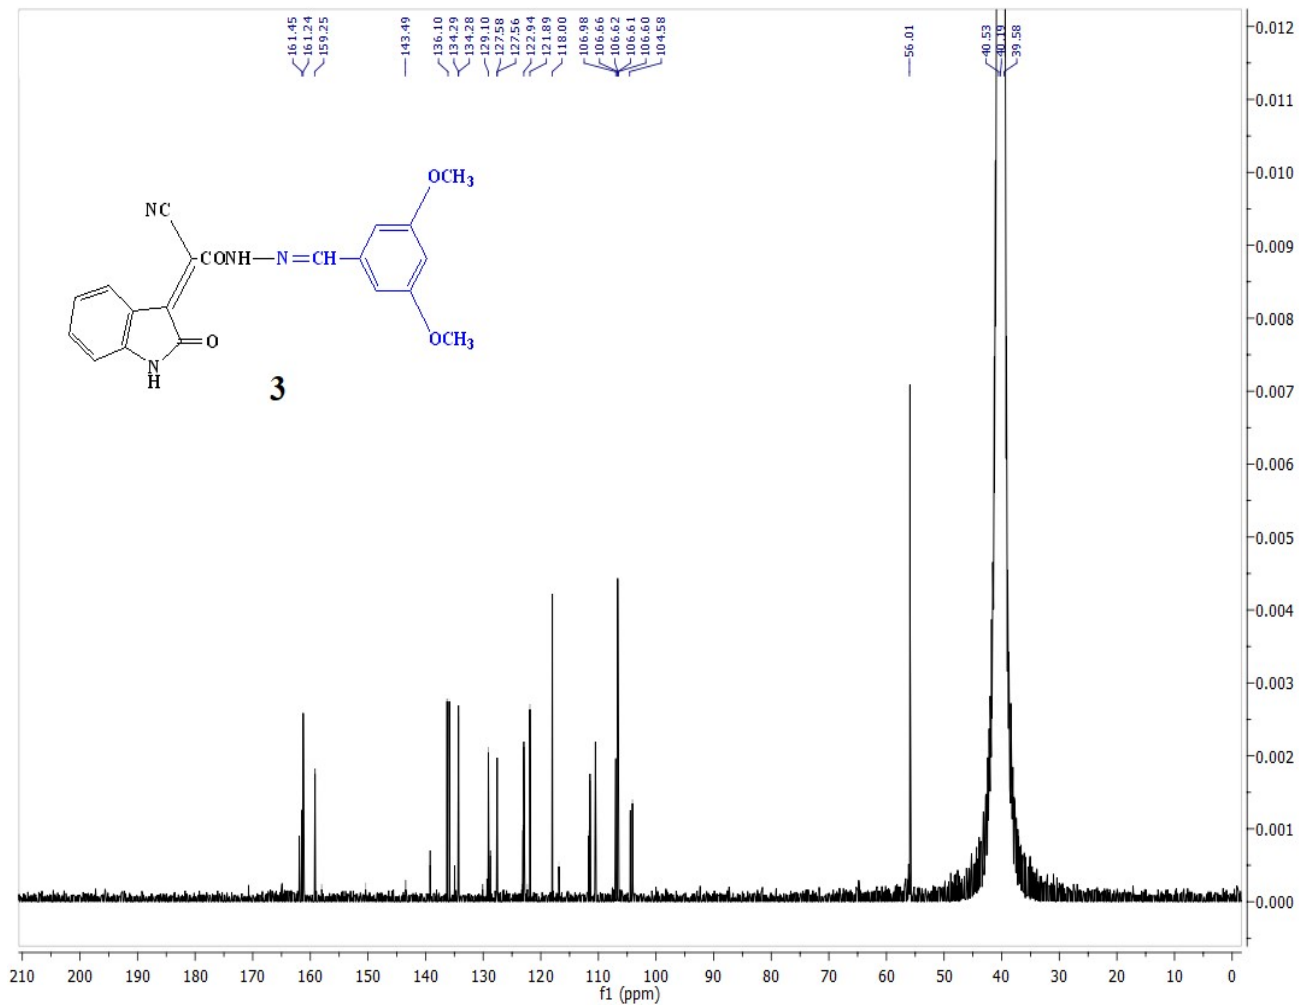

**Fig.S7.**  $^{13}\text{C-NMR}$  spectra of compound **3**.

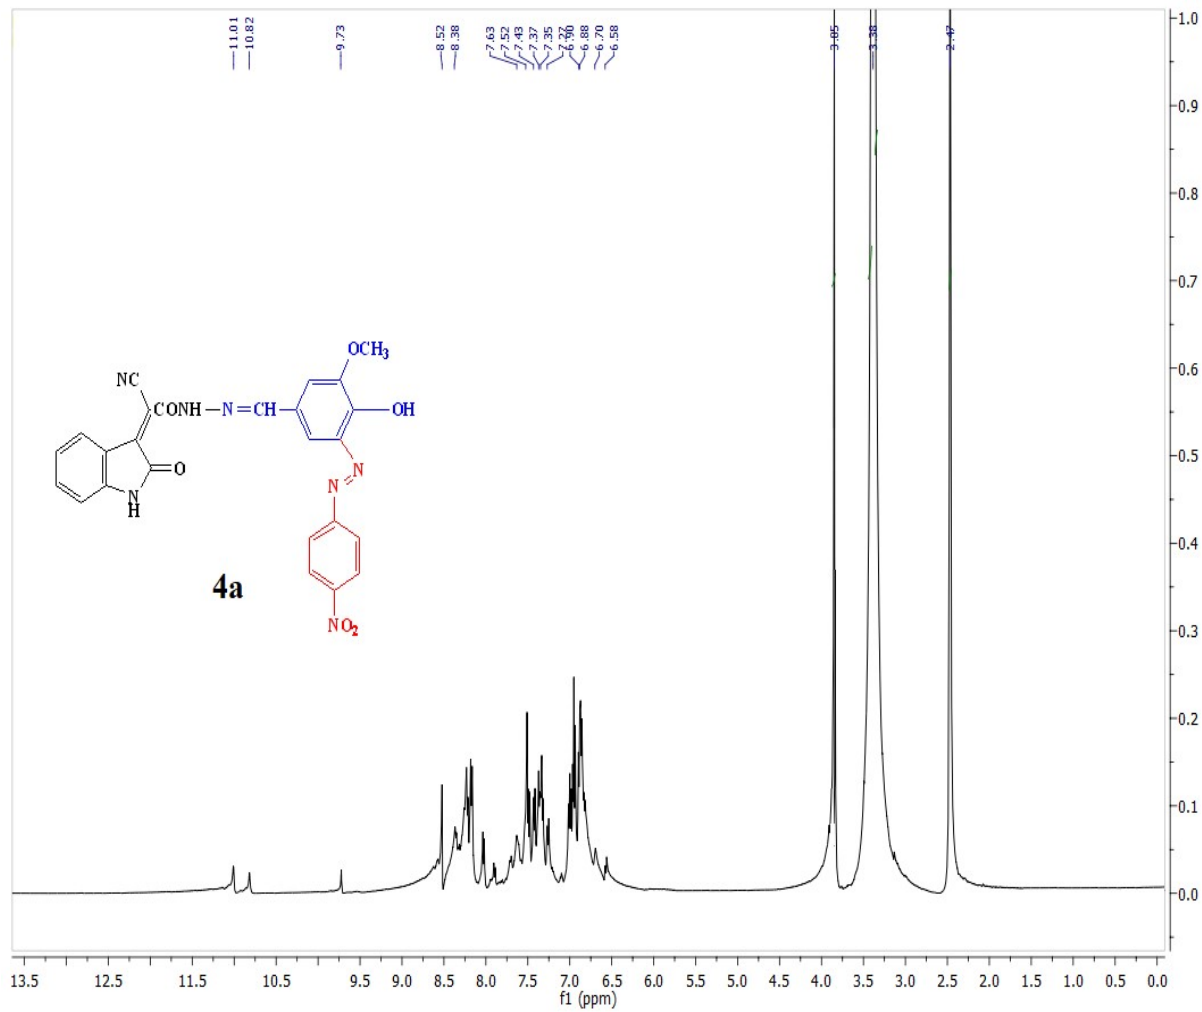

**Fig.S8.** <sup>1</sup>H-NMR spectra of compound **4a**.

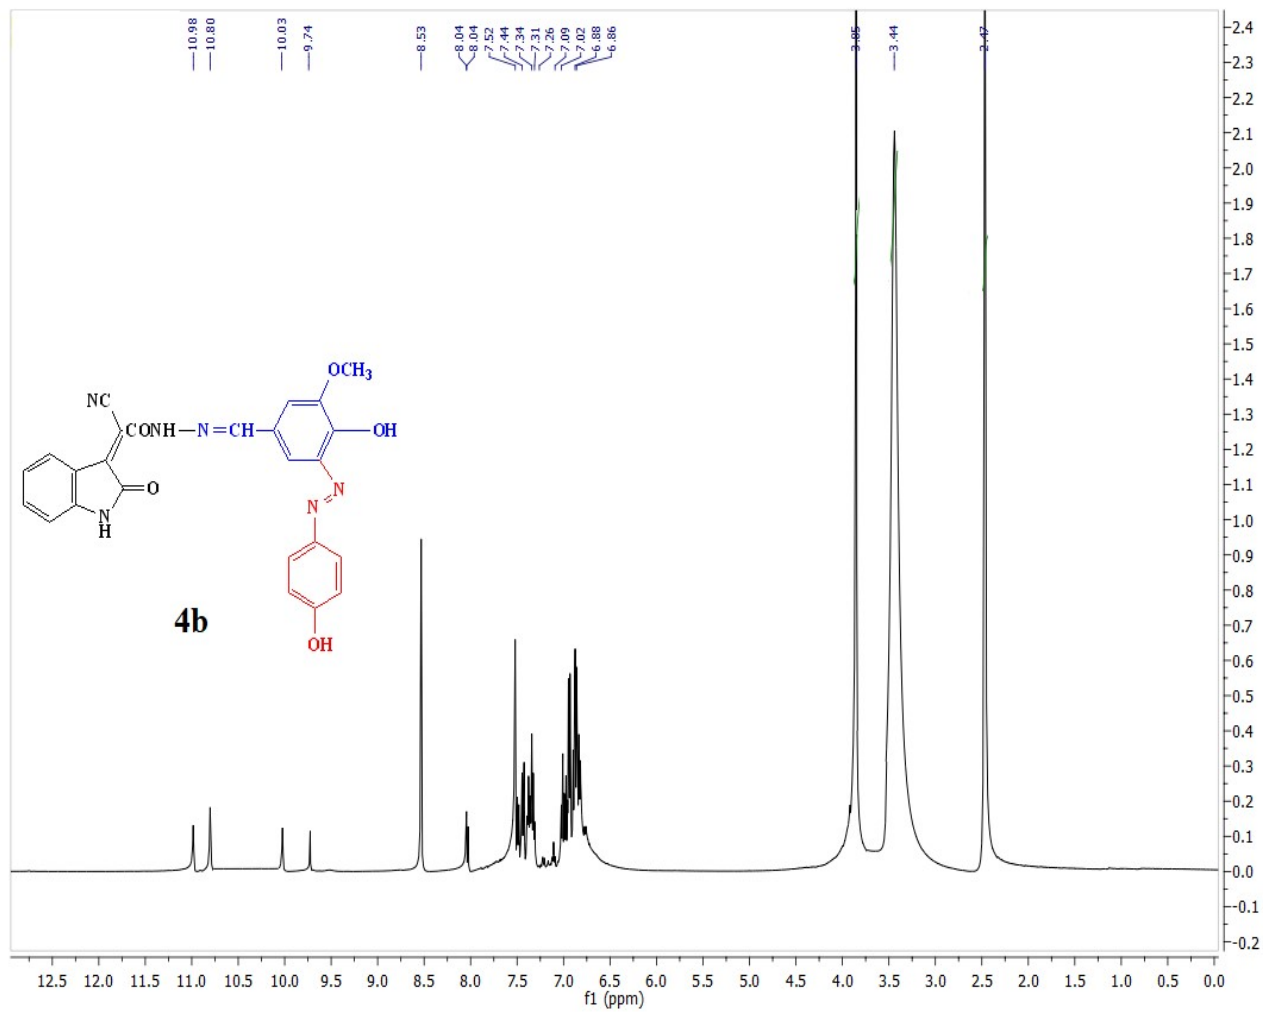

**Fig.S9.** <sup>1</sup>H-NMR spectra of compound **4b**.

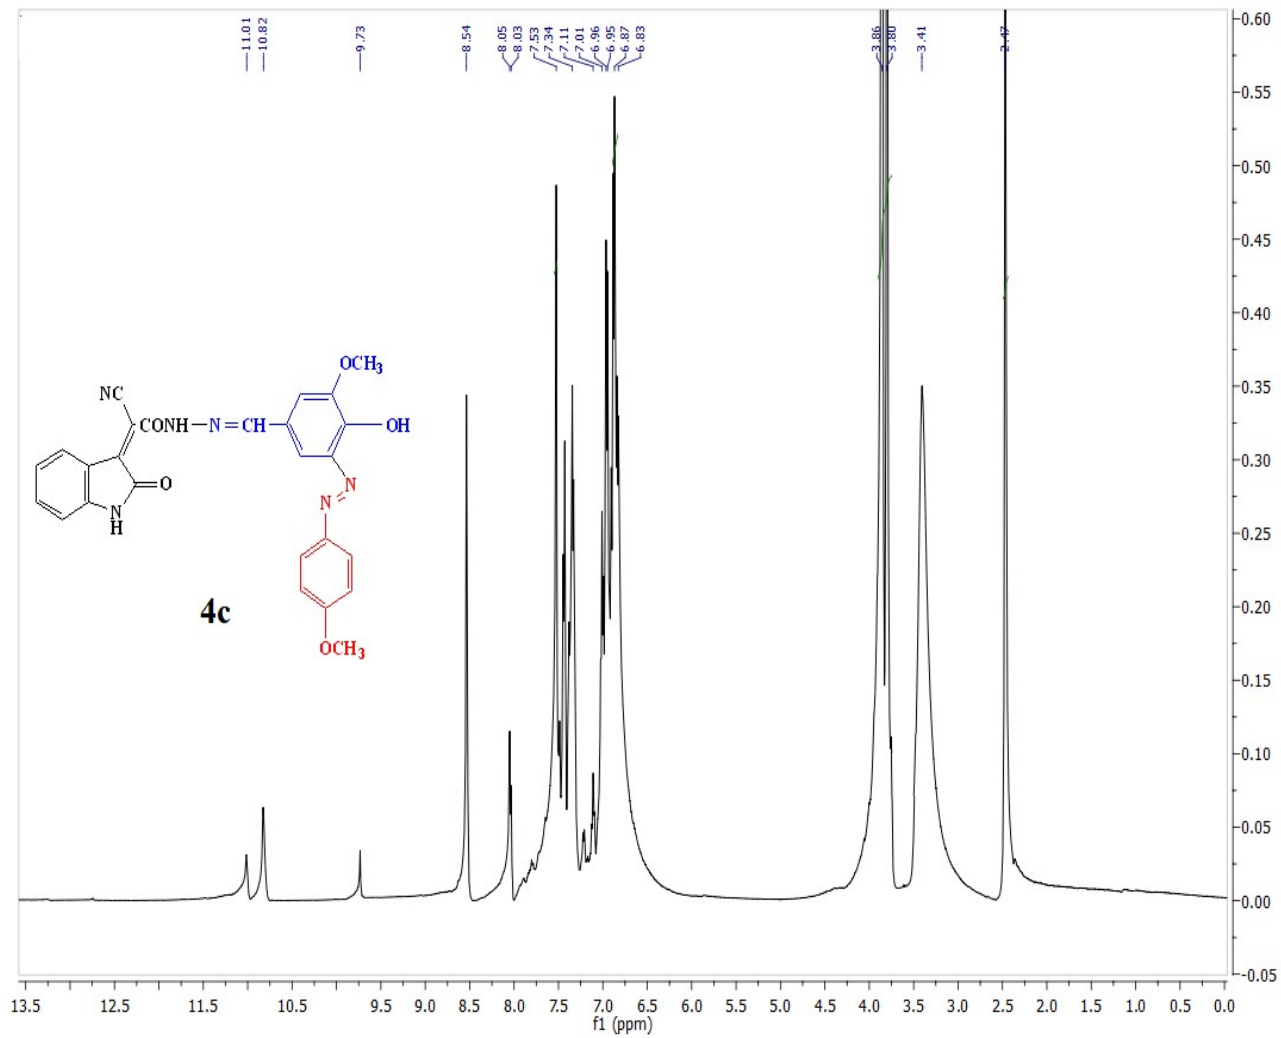

**Fig.S10.** <sup>1</sup>H-NMR spectra of compound **4c**.

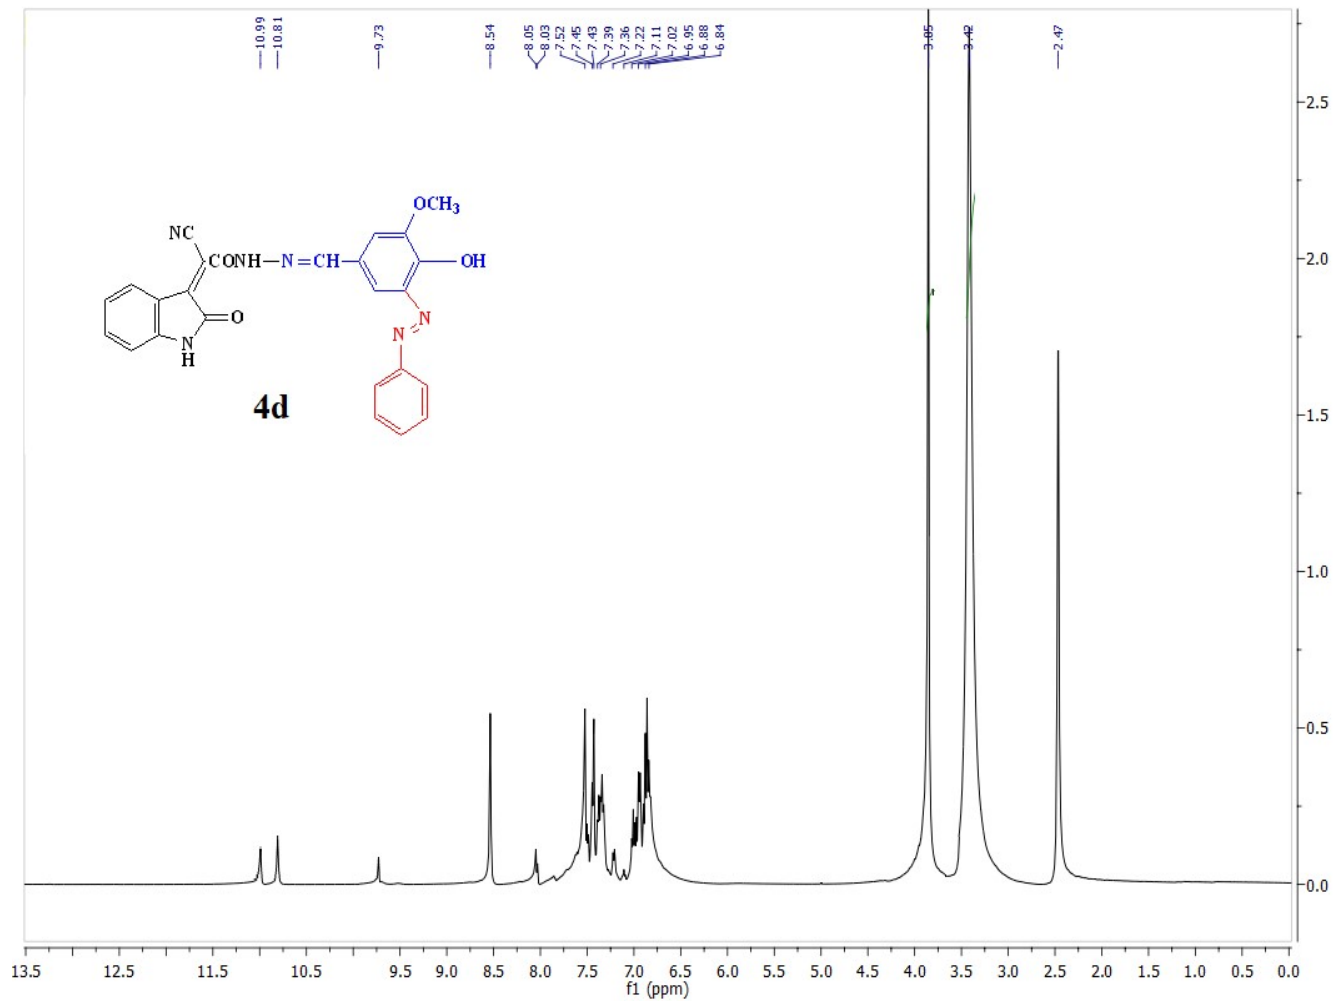

**Fig.S11.** <sup>1</sup>H-NMR spectra of compound **4d**.

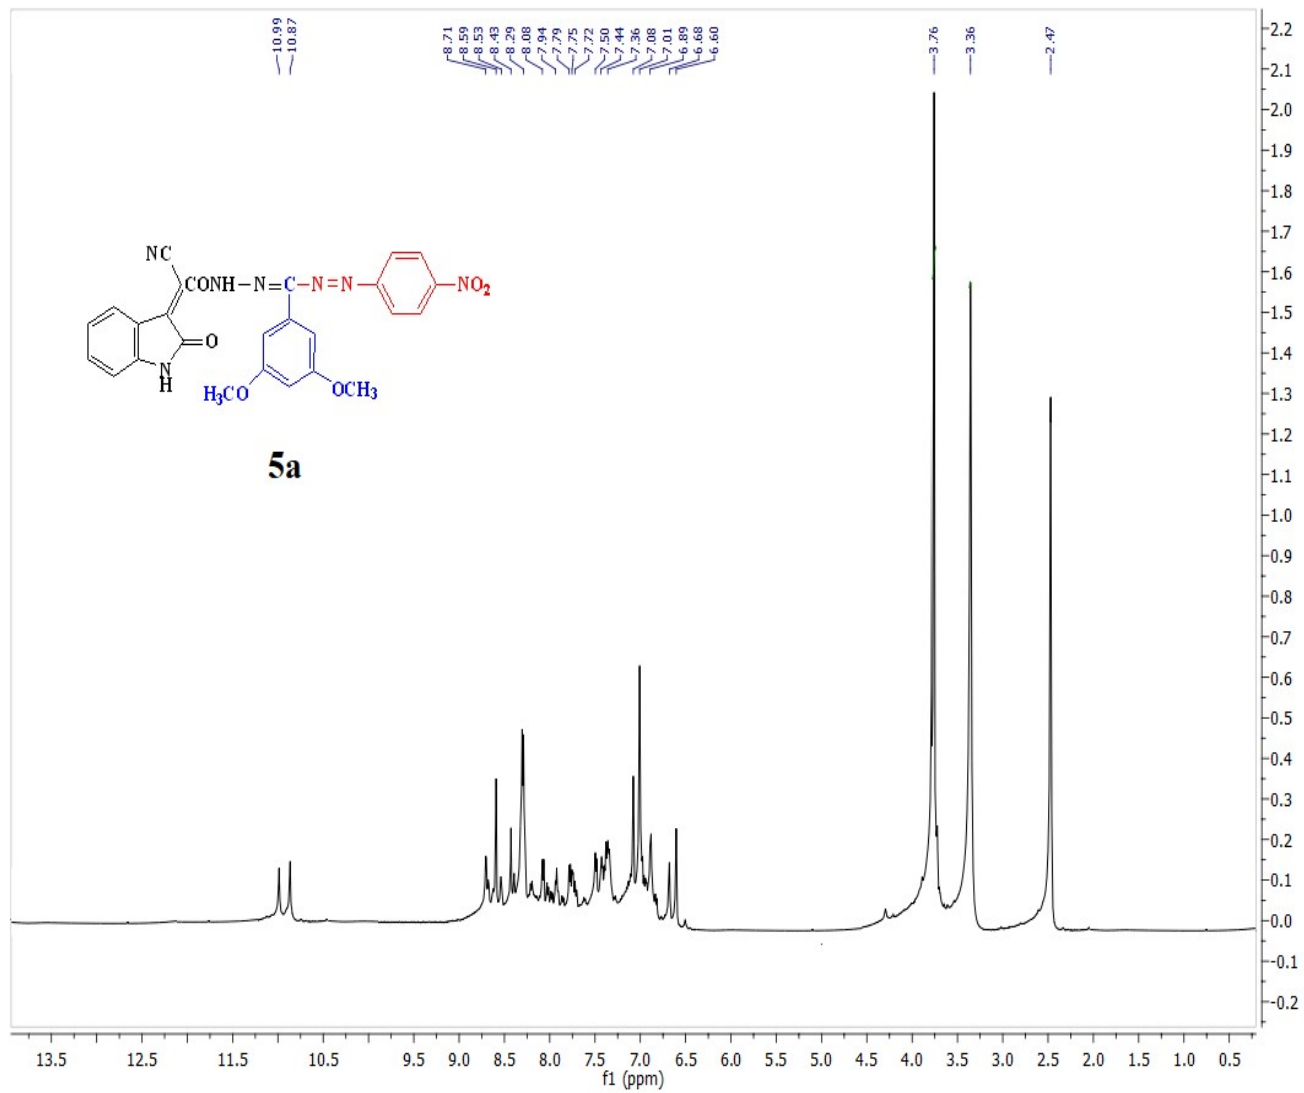

**Fig.S12.** <sup>1</sup>H-NMR spectra of compound **5a**.

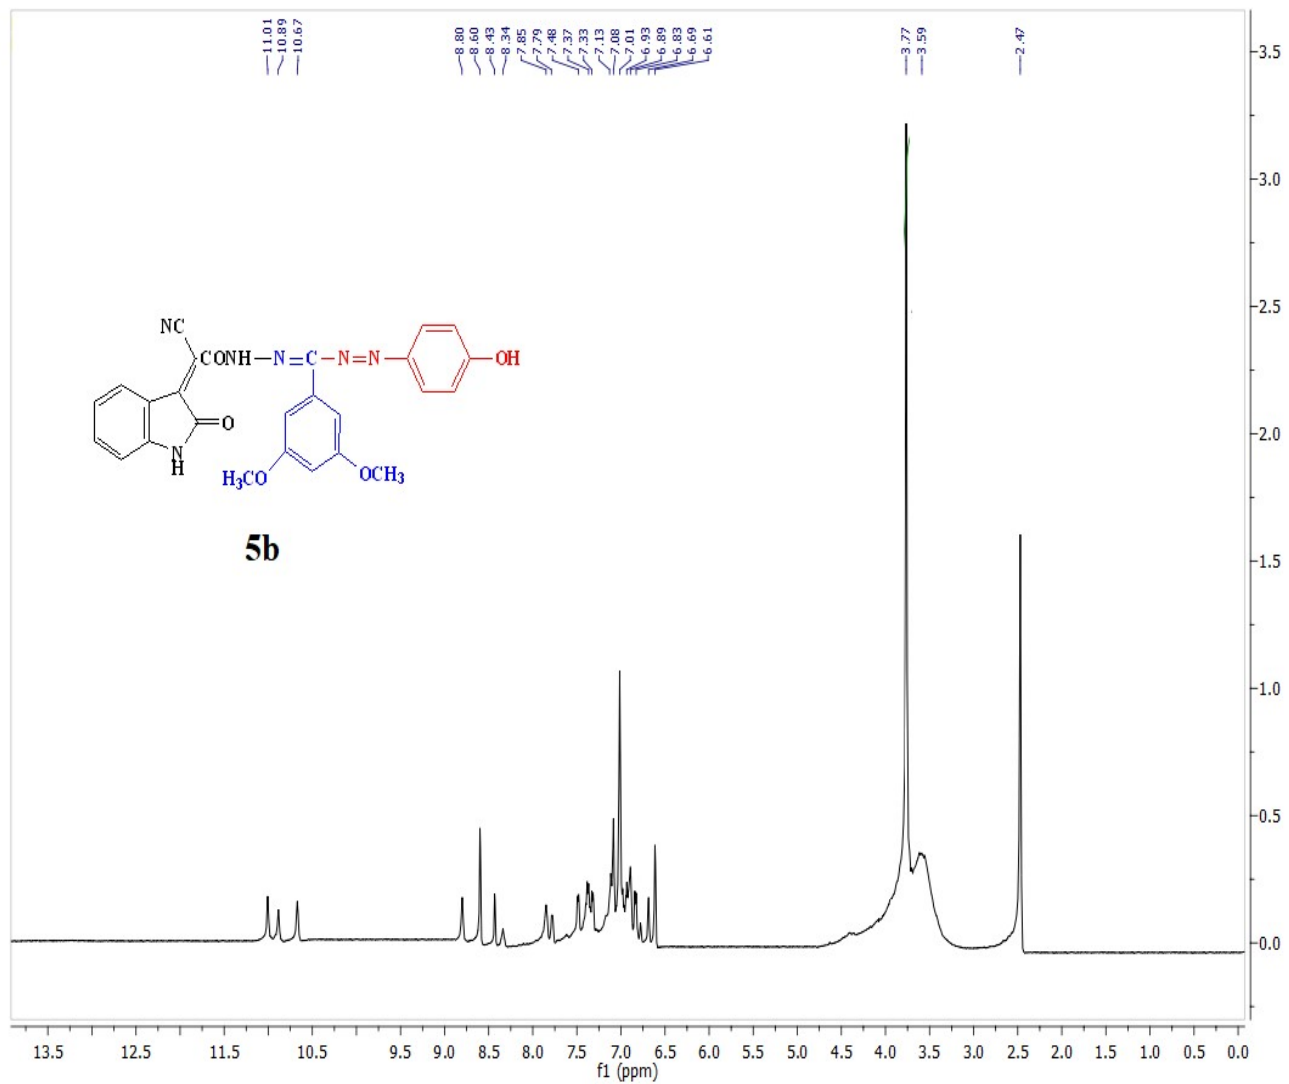

**Fig.S13.** <sup>1</sup>H-NMR spectra of compound **5b**.

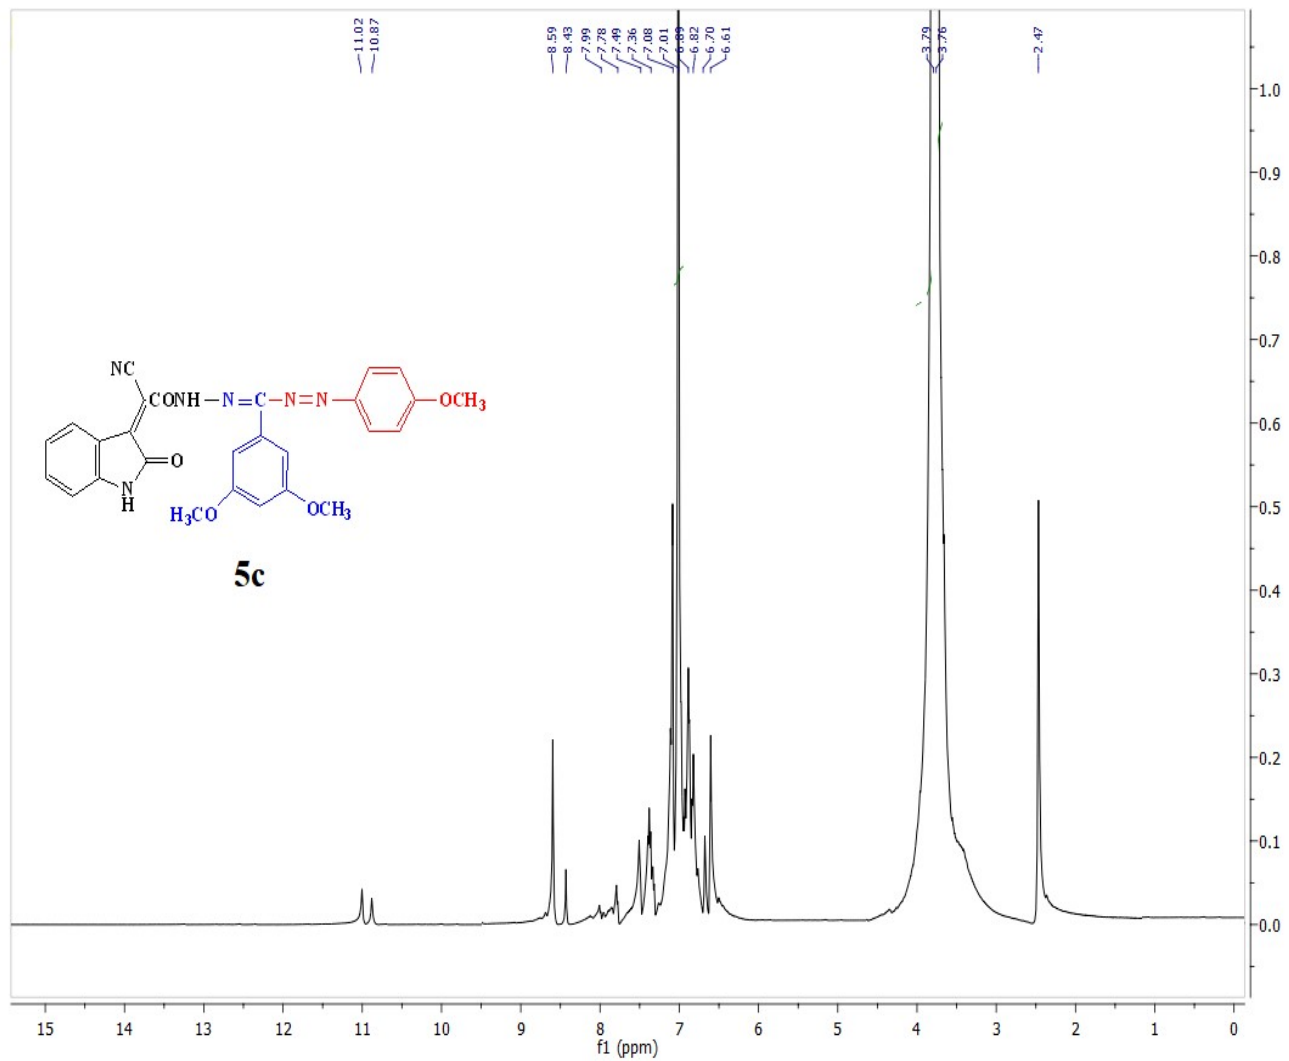

**Fig.S14.** <sup>1</sup>H-NMR spectra of compound **5c**.

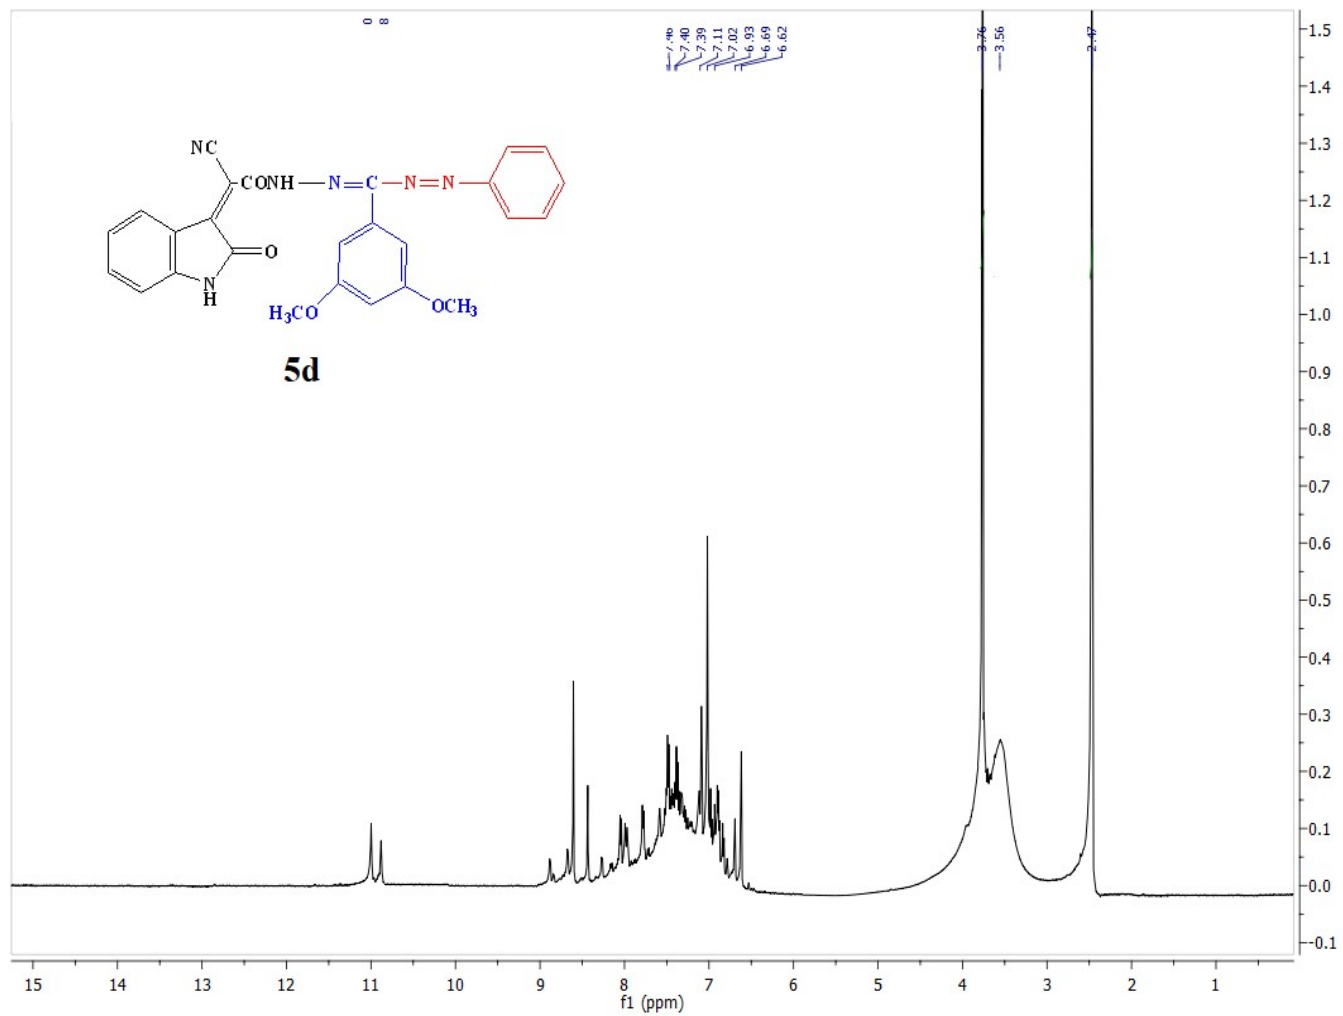

**Fig.S15.** <sup>1</sup>H-NMR spectra of compound **5d**.

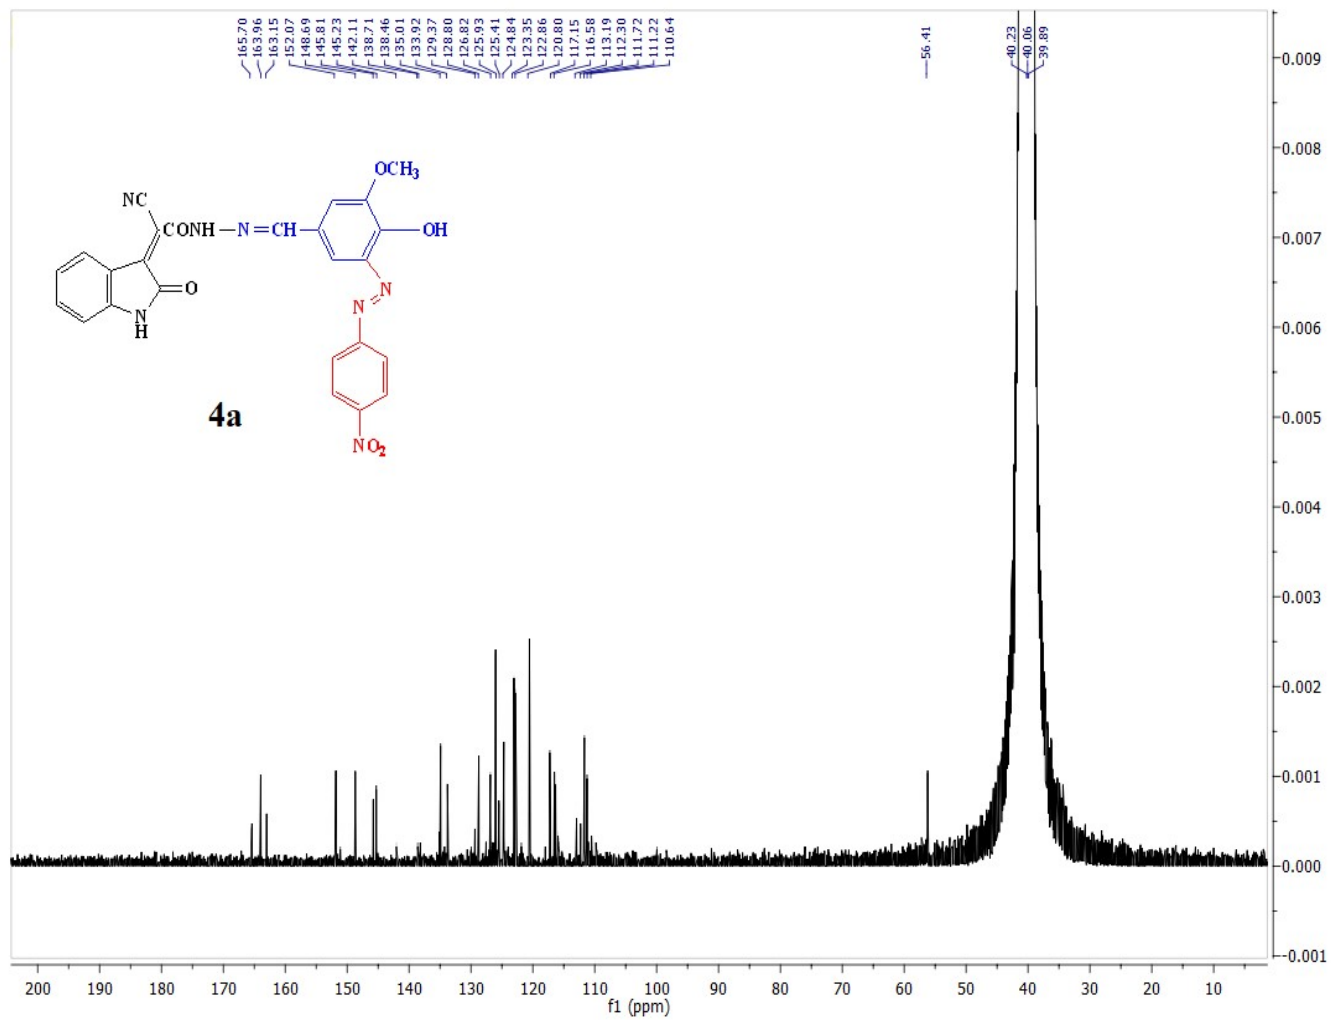

**Fig.S16.** <sup>13</sup>C-NMR spectra of compound **4a**.

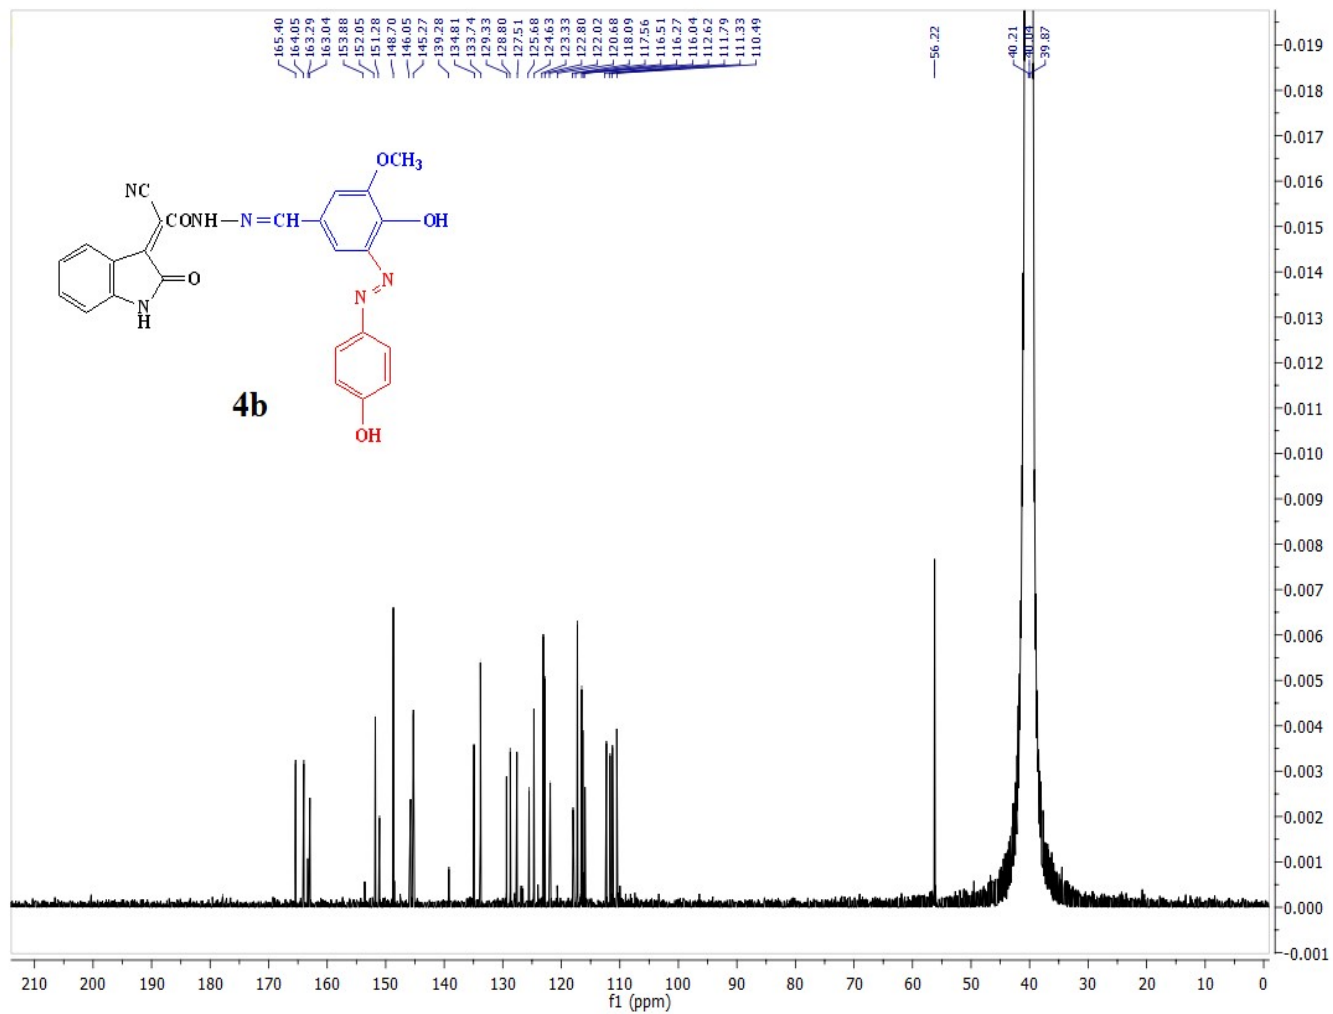

**Fig.S17.**  $^{13}\text{C}$ -NMR spectra of compound **4b**.

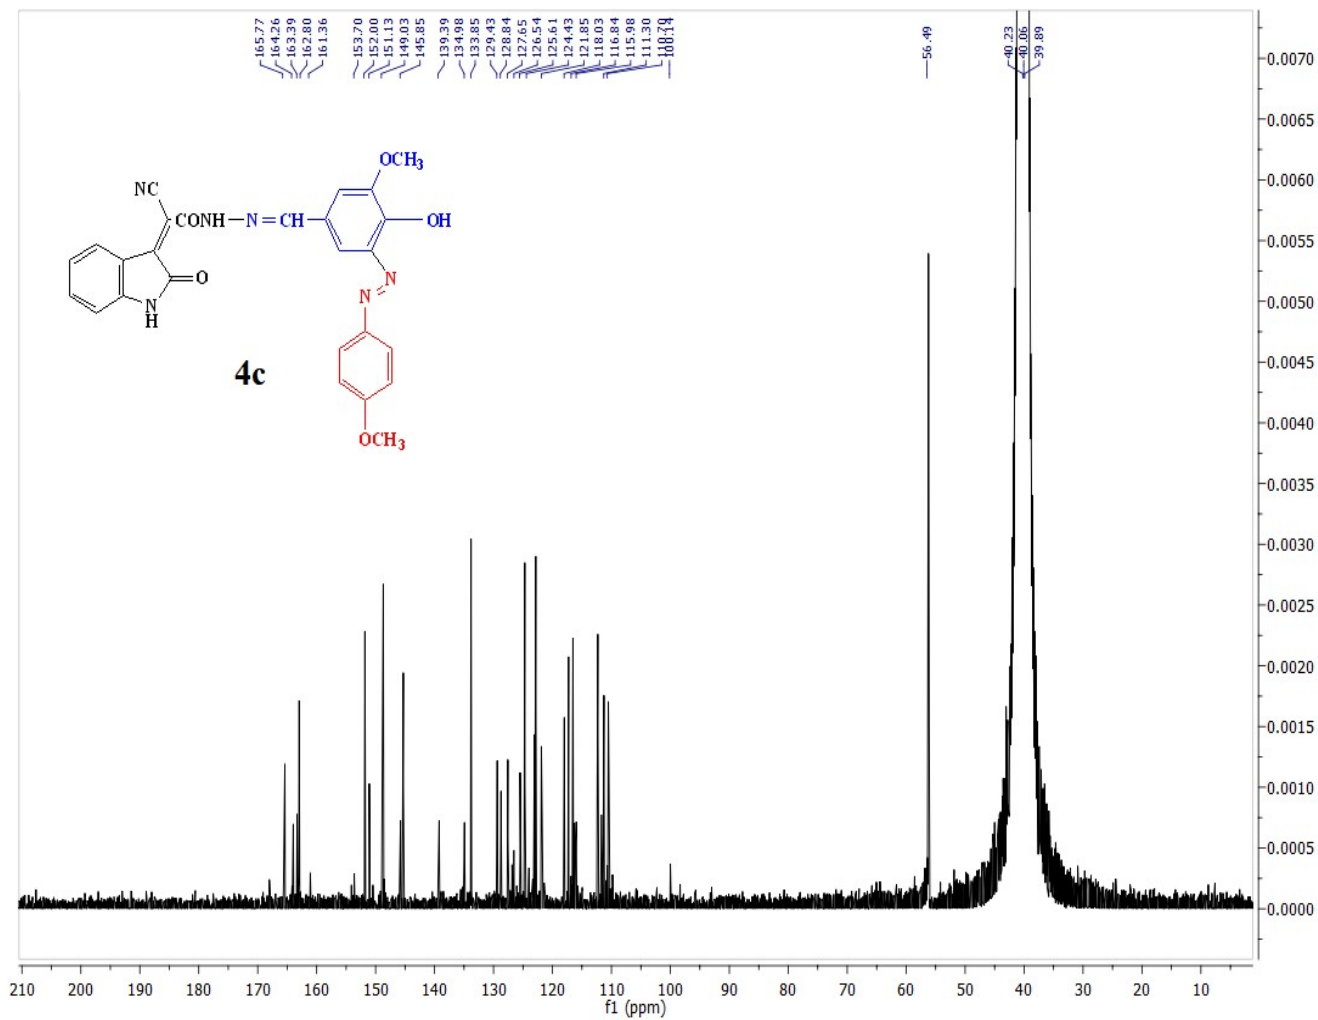

**Fig.S18.**  $^{13}\text{C}$ -NMR spectra of compound **4c**.

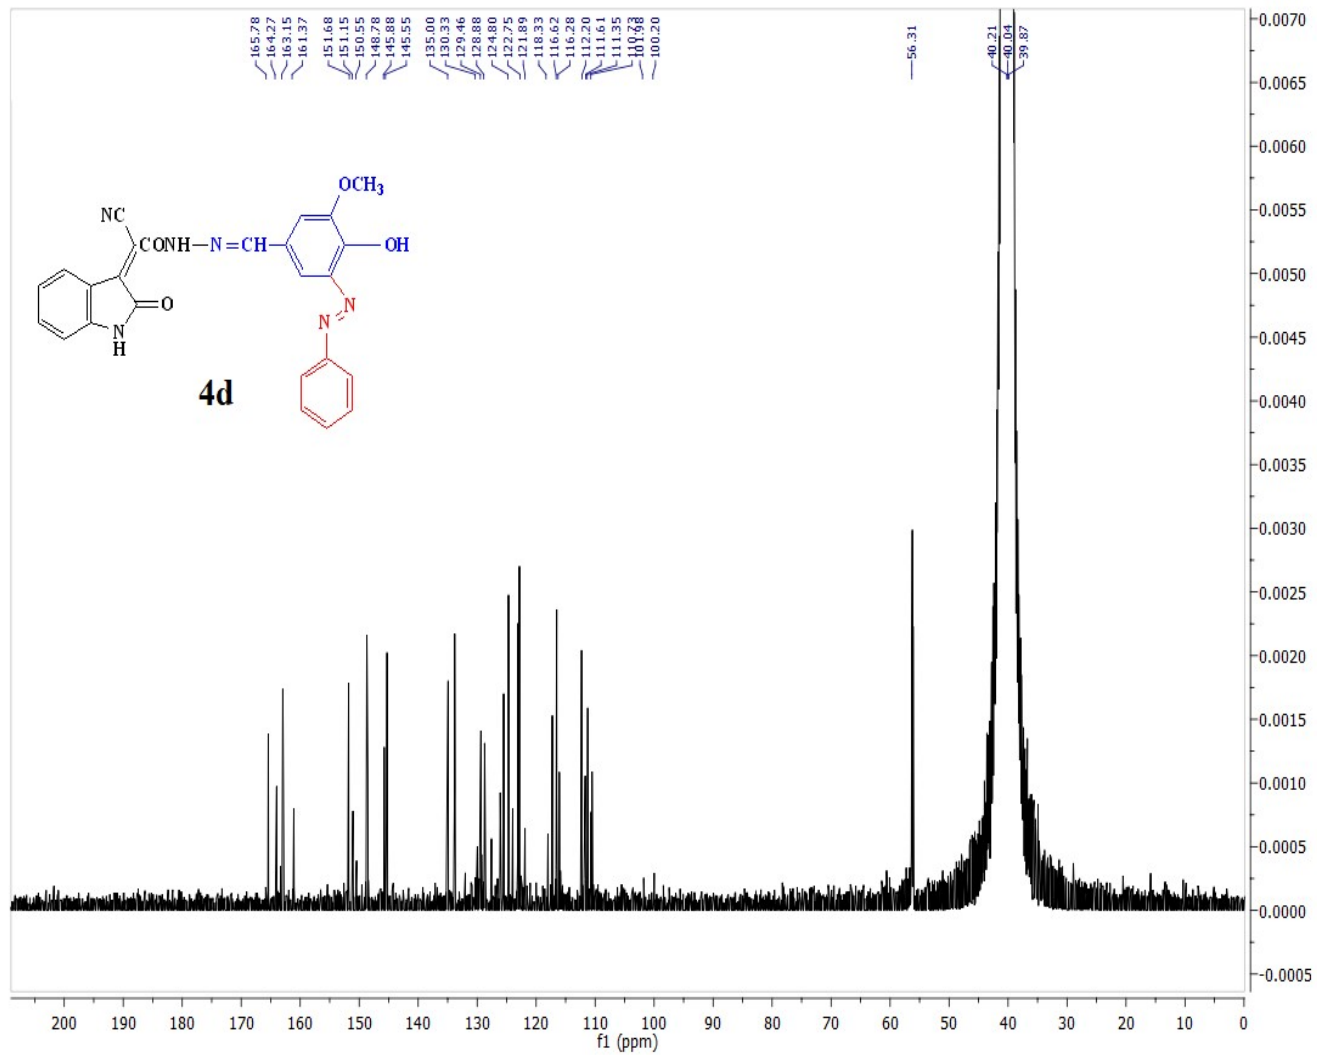

**Fig.S19.**  $^{13}\text{C}$ -NMR spectra of compound **4d**.

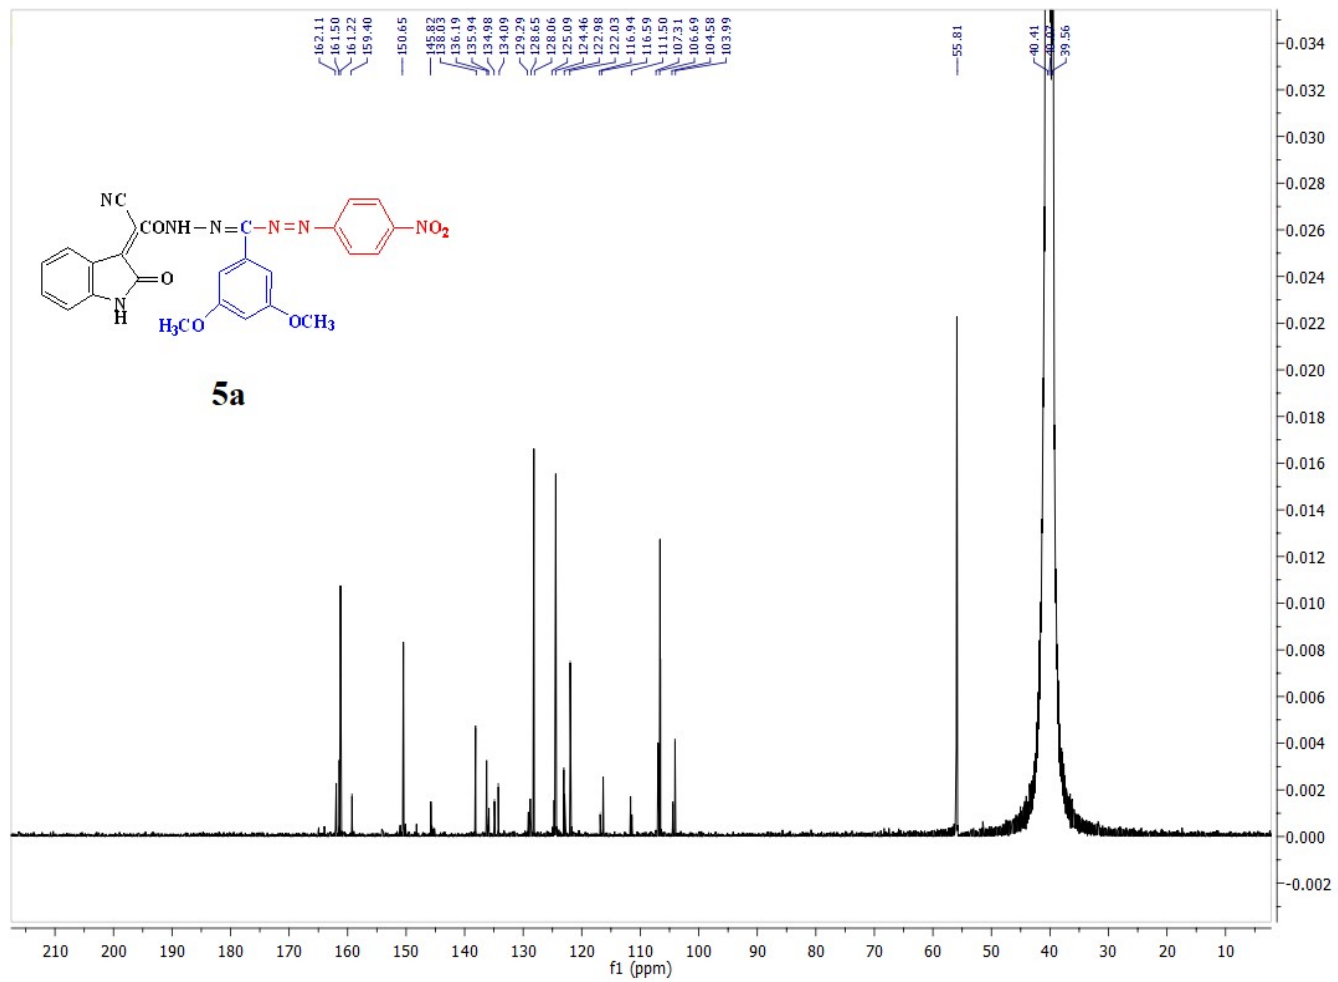

**Fig.S20.** <sup>13</sup>C-NMR spectra of compound **5a**.

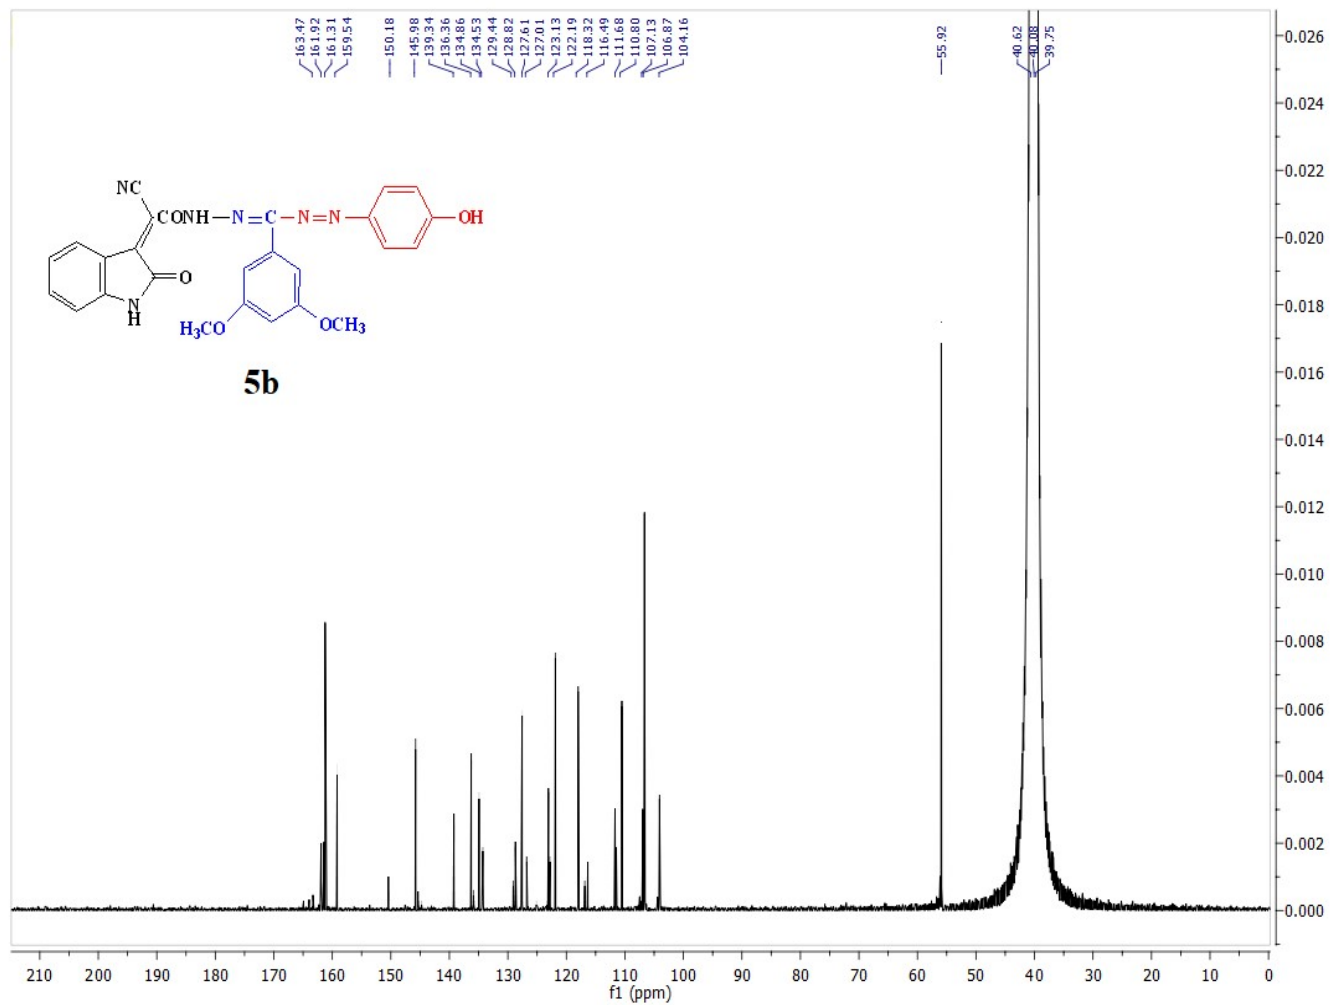

**Fig.S21.** <sup>13</sup>C-NMR spectra of compound **5b**.

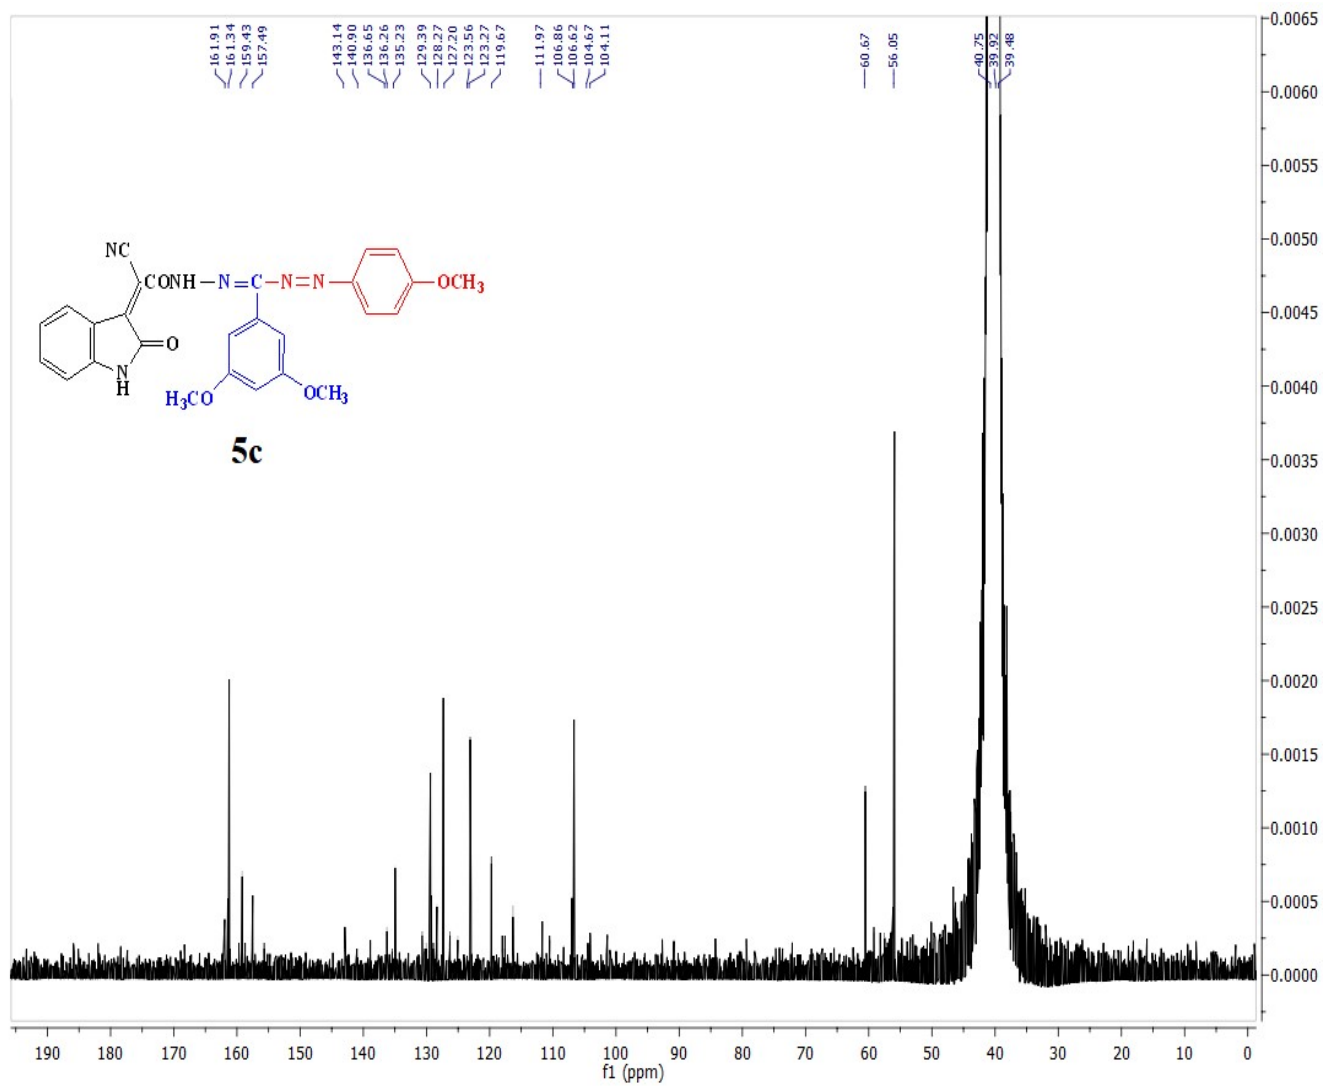

**Fig.S22.** <sup>13</sup>C-NMR spectra of compound **5c**.

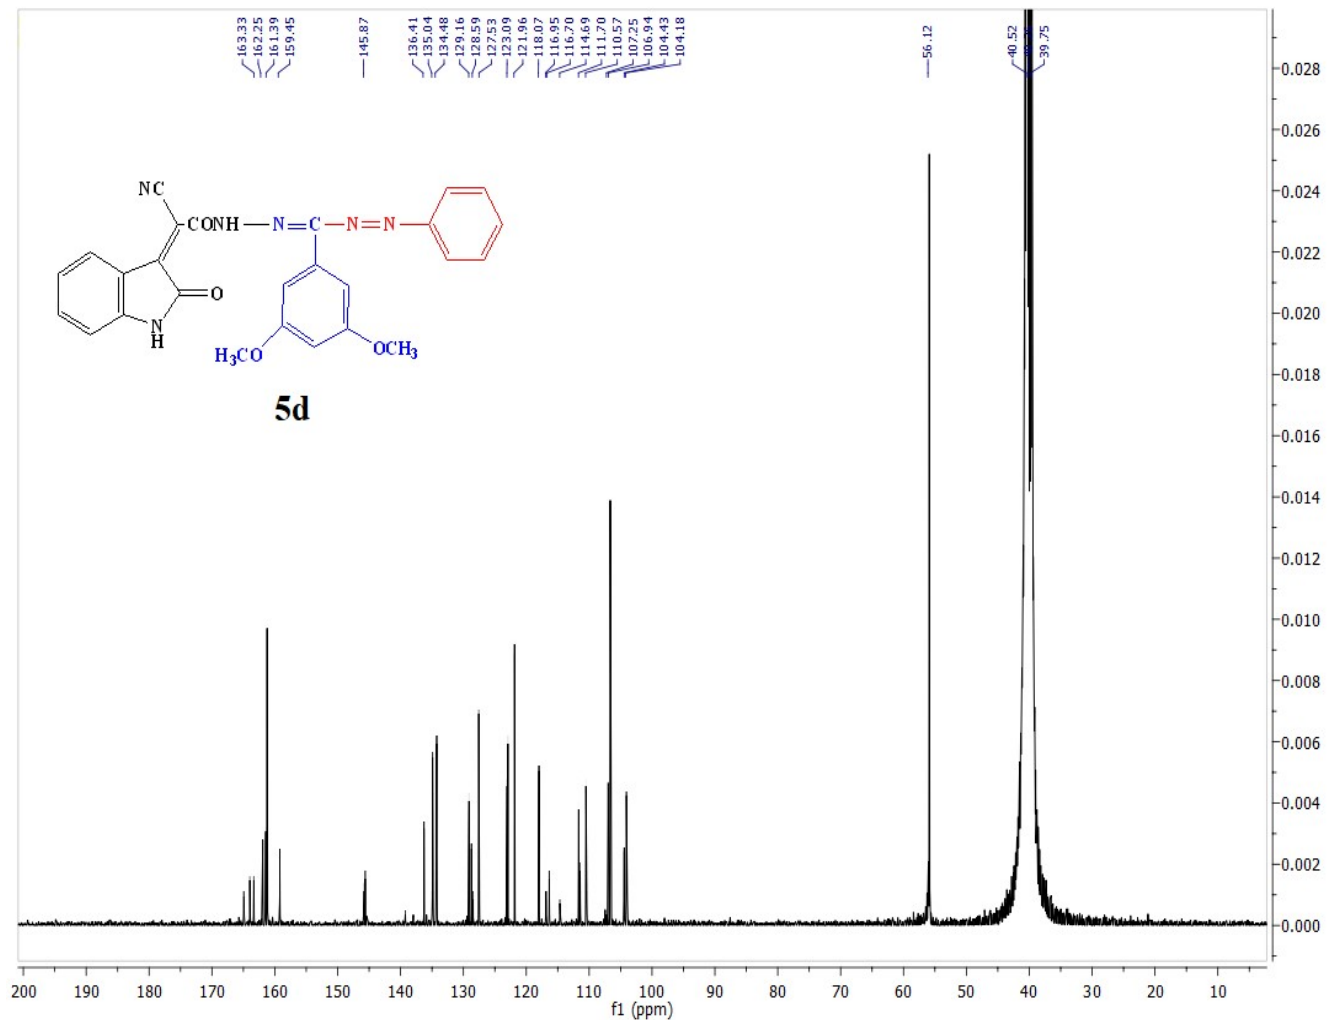

**Fig.S23.** <sup>13</sup>C-NMR spectra of compound **5d**.

**Table S1.** IC<sub>50</sub> values of Isatin derivatives on Nitric Oxide inhibition and viability of Raw-macrophages:

| <b>compound</b>  | <b>Cytotoxicity<br/>IC<sub>50</sub>(<math>\mu</math>g/ml)</b> | <b>Nitric Oxide<br/>IC<sub>50</sub>(<math>\mu</math>g/ml)</b> |
|------------------|---------------------------------------------------------------|---------------------------------------------------------------|
| <b>2</b>         | 593.1 $\pm$ 0.1                                               | 2.103 $\pm$ 0.1                                               |
| <b>4a</b>        | 171.4 $\pm$ 0.06                                              | 10.83 $\pm$ 0.06                                              |
| <b>4b</b>        | 50.94 $\pm$ 0.3                                               | 2.936 $\pm$ 0.3                                               |
| <b>4c</b>        | 214.3 $\pm$ 0.1                                               | 19.56 $\pm$ 0.1                                               |
| <b>4d</b>        | 1578 $\pm$ 0.05                                               | 55.27 $\pm$ 0.05                                              |
| <b>3</b>         | 3939 $\pm$ 0.2                                                | 2.909 $\pm$ 0.2                                               |
| <b>5a</b>        | 2330 $\pm$ 0.2                                                | 3.243 $\pm$ 0.2                                               |
| <b>5b</b>        | 15010 $\pm$ 0.05                                              | 11.07 $\pm$ 0.05                                              |
| <b>5c</b>        | 89.76 $\pm$ 0.15                                              | 6.924 $\pm$ 0.2                                               |
| <b>5d</b>        | 1048 $\pm$ 0.3                                                | 1.27 $\pm$ 0.3                                                |
| <b>Celecoxib</b> | 1043 $\pm$ 0.3                                                | 1.12 $\pm$ 0.1                                                |

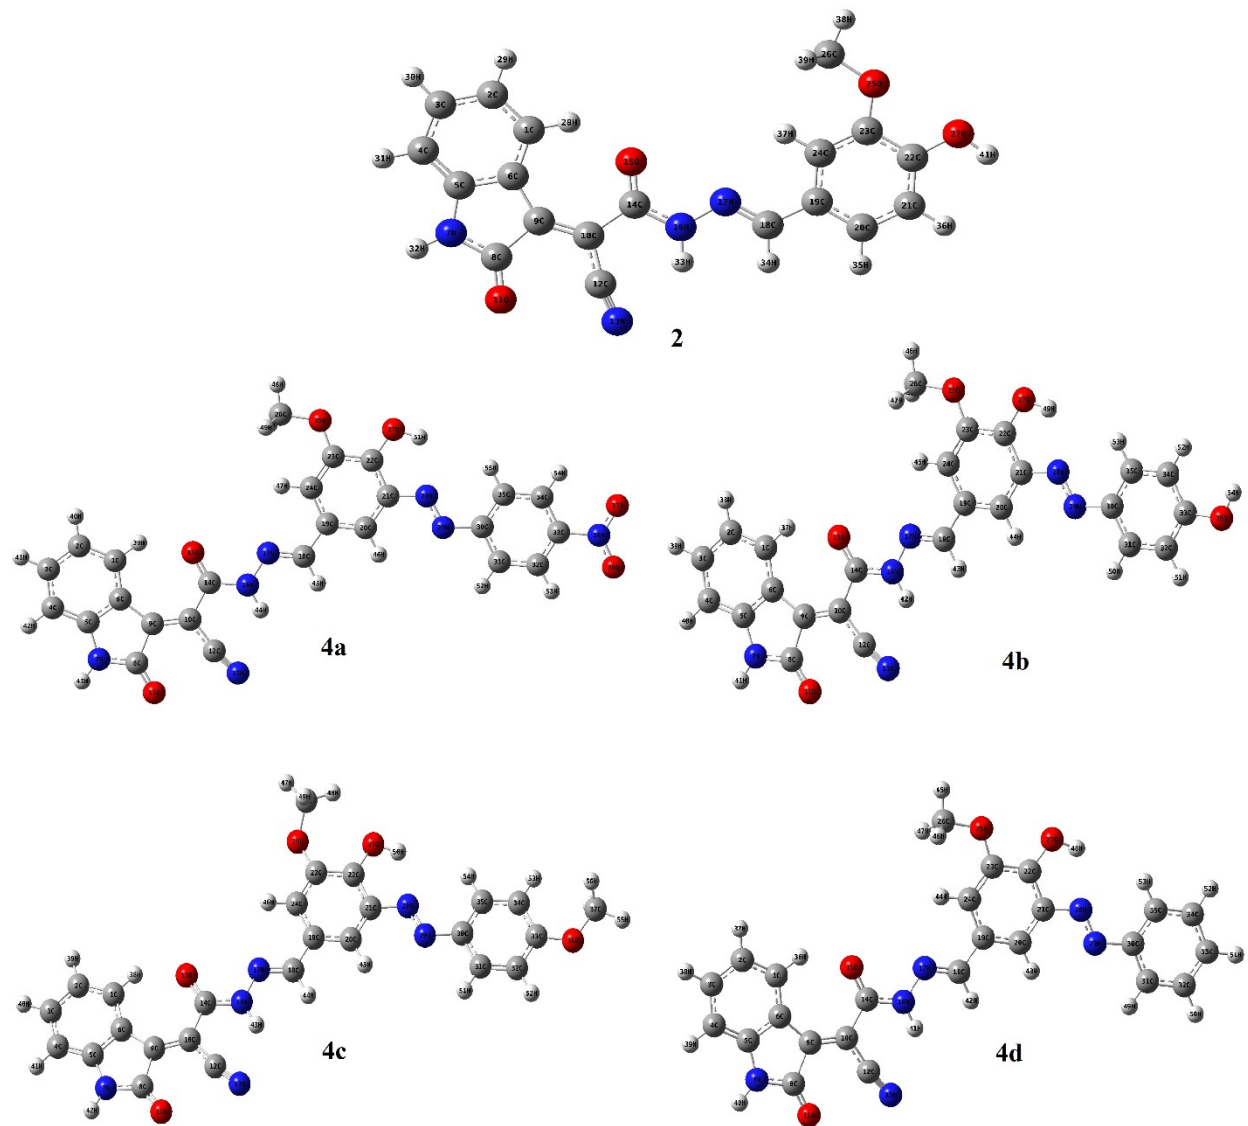

Fig.S24. Optimized isatin dye structures 2, 4a-d.

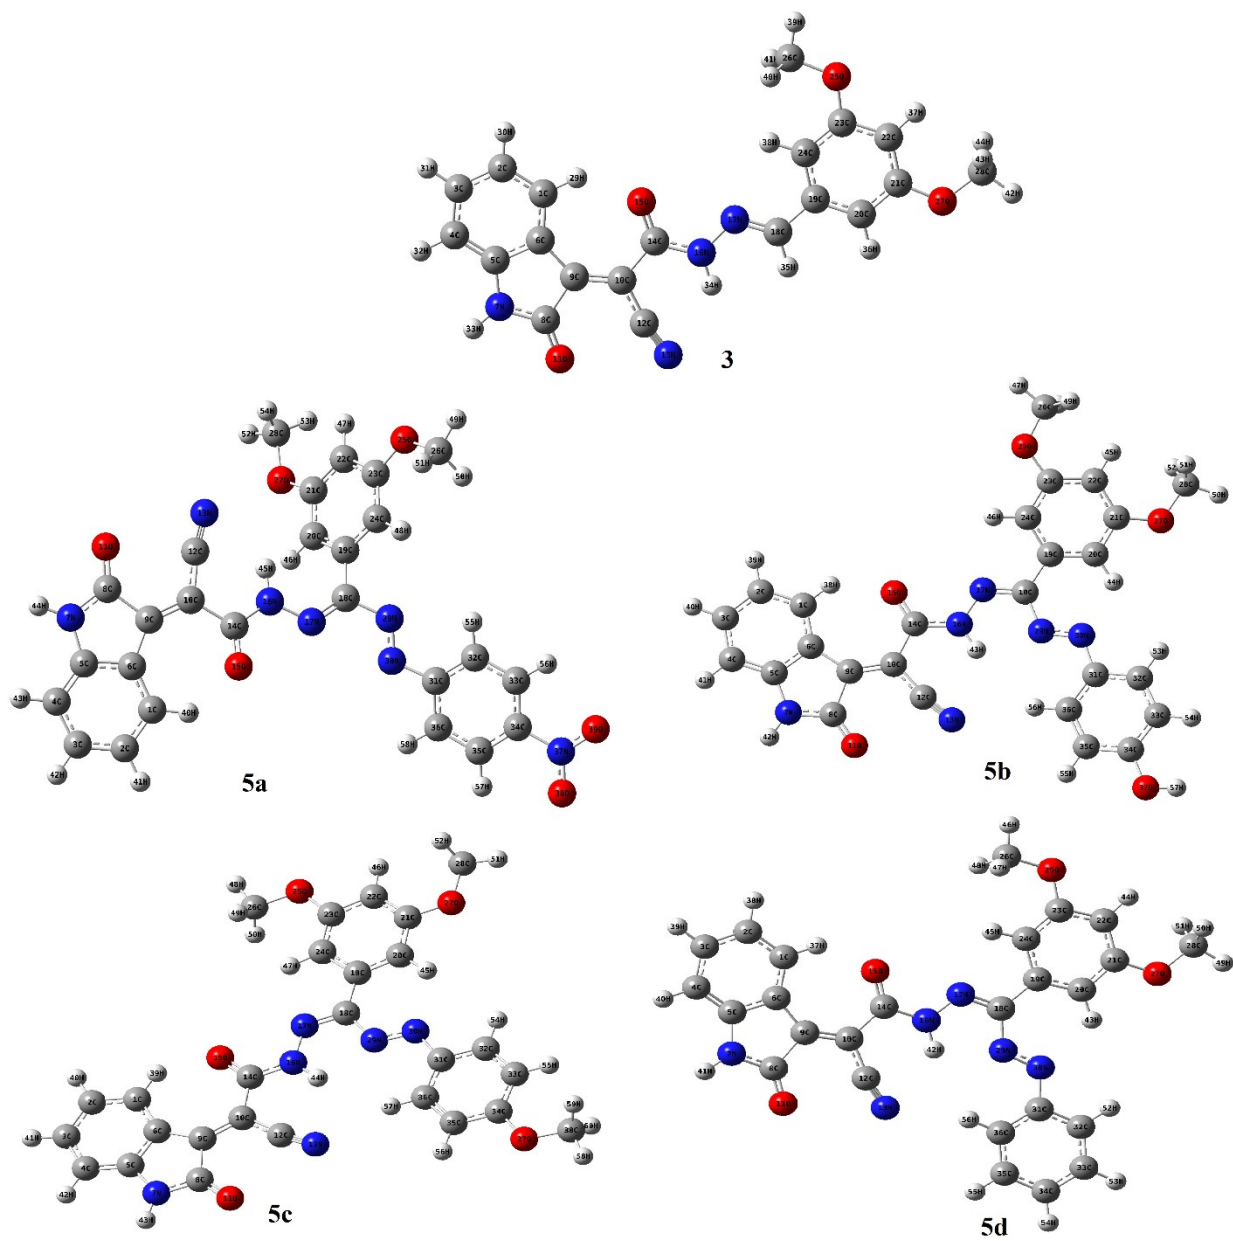

Fig.S25. Optimized isatin dye structures 3, 5a-d.

**Table S2.** calculated parameters for the isatin compounds **2**, **3**, **4a-d**, and **5a-d** that were obtained using DFT/B3LYP/6-311G++(d, p).

| Compound  | $E_{\text{HOMO}}$<br>(eV) | $E_{\text{LUMO}}$<br>(eV) | $\Delta E$<br>( $E_{\text{LUMO}} - E_{\text{HOMO}}$ )<br>(eV) | Dipole<br>moment<br>DM<br>(D) | Ionization<br>potential<br>IP<br>(eV) | Electron<br>affinity<br>EA<br>(eV) | Hardness<br>$\eta$<br>(eV) | Softness $\sigma$<br>(eV <sup>-1</sup> ) | Chemical<br>potential<br>$\mu$<br>(eV) | Electronega-<br>tivity<br>$\chi$ (eV) | Electroph-<br>ilicity<br>$\omega$ | $\Delta N_{\text{max}}$ |
|-----------|---------------------------|---------------------------|---------------------------------------------------------------|-------------------------------|---------------------------------------|------------------------------------|----------------------------|------------------------------------------|----------------------------------------|---------------------------------------|-----------------------------------|-------------------------|
| <b>2</b>  | -6.0442                   | -3.54973                  | 2.494469                                                      | 2.8176                        | 6.044196                              | 3.549727                           | 1.247235                   | 0.801774                                 | -4.79696                               | 4.796962                              | 9.224745                          | 3.846078                |
| <b>4a</b> | -6.42026                  | -3.833                    | 2.58726                                                       | 9.9897                        | 6.420258                              | 3.832998                           | 1.29363                    | 0.773019                                 | -5.12663                               | 5.126628                              | 10.15836                          | 3.962979                |
| <b>4b</b> | -5.98705                  | -3.55735                  | 2.429706                                                      | 3.1473                        | 5.987052                              | 3.557346                           | 1.214853                   | 0.823145                                 | -4.7722                                | 4.772199                              | 9.373104                          | 3.928211                |
| <b>4c</b> | -6.04311                  | -3.50156                  | 2.541545                                                      | 4.008                         | 6.043108                              | 3.501563                           | 1.270772                   | 0.786923                                 | -4.77234                               | 4.772335                              | 8.961158                          | 3.75546                 |
| <b>4d</b> | -6.0812                   | -3.58374                  | 2.497462                                                      | 2.5668                        | 6.081204                              | 3.583741                           | 1.248731                   | 0.800813                                 | -4.83247                               | 4.832473                              | 9.350608                          | 3.869906                |
| <b>3</b>  | -6.29264                  | -3.58946                  | 2.70318                                                       | 4.6211                        | 6.292636                              | 3.589456                           | 1.35159                    | 0.739869                                 | -4.94105                               | 4.941046                              | 9.03156                           | 3.655728                |
| <b>5a</b> | -6.57672                  | -3.87654                  | 2.700187                                                      | 5.7359                        | 6.576723                              | 3.876536                           | 1.350094                   | 0.740689                                 | -5.22663                               | 5.22663                               | 10.11695                          | 3.871309                |
| <b>5b</b> | -5.8812                   | -3.52986                  | 2.351337                                                      | 2.7877                        | 5.8812                                | 3.529863                           | 1.175669                   | 0.85058                                  | -4.70553                               | 4.705531                              | 9.416781                          | 4.00243                 |
| <b>5c</b> | -5.92909                  | -3.57014                  | 2.358956                                                      | 0.3559                        | 5.929092                              | 3.570136                           | 1.179478                   | 0.847833                                 | -4.74961                               | 4.749614                              | 9.563056                          | 4.026877                |
| <b>5d</b> | -6.01045                  | -3.6583                   | 2.352153                                                      | 2.7992                        | 6.010454                              | 3.658301                           | 1.176077                   | 0.850285                                 | -4.83438                               | 4.834377                              | 9.936088                          | 4.110597                |

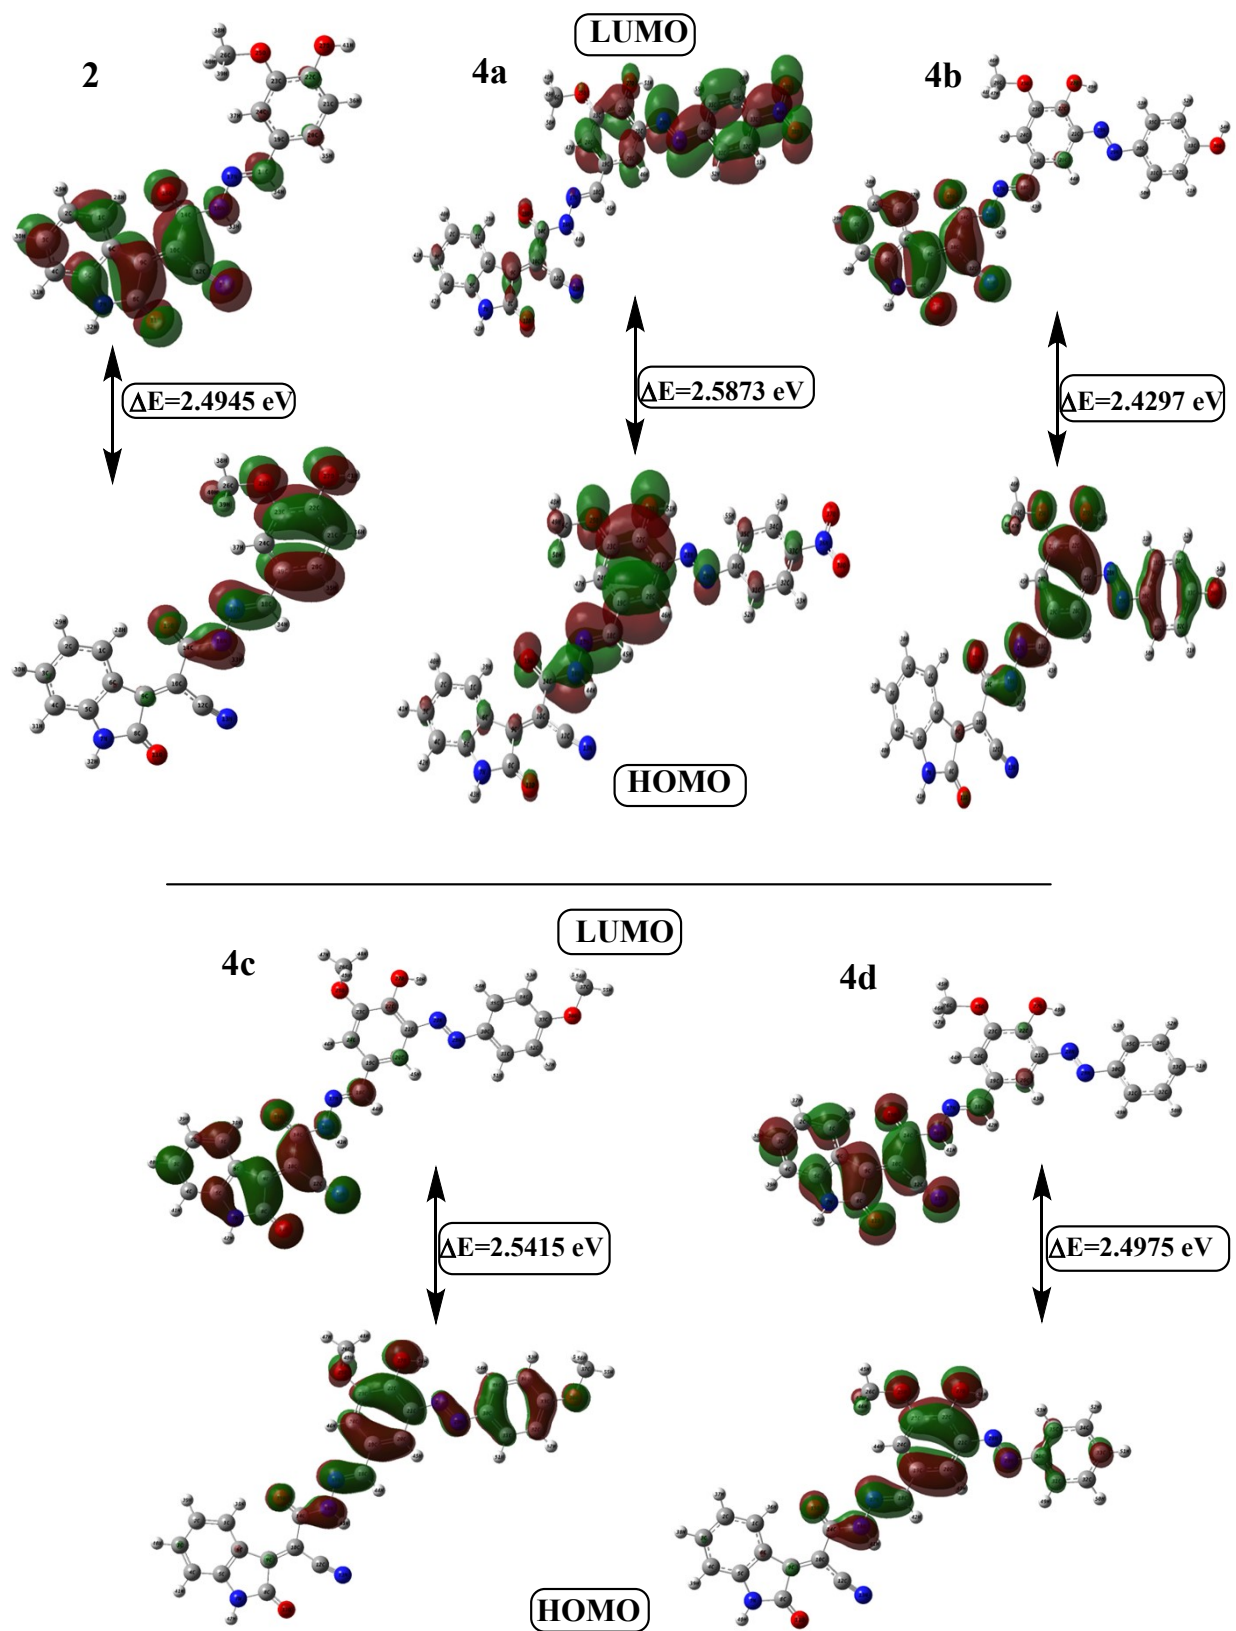

Fig. S26. The calculated HOMO and LUMO of compounds 2, 4a-d.

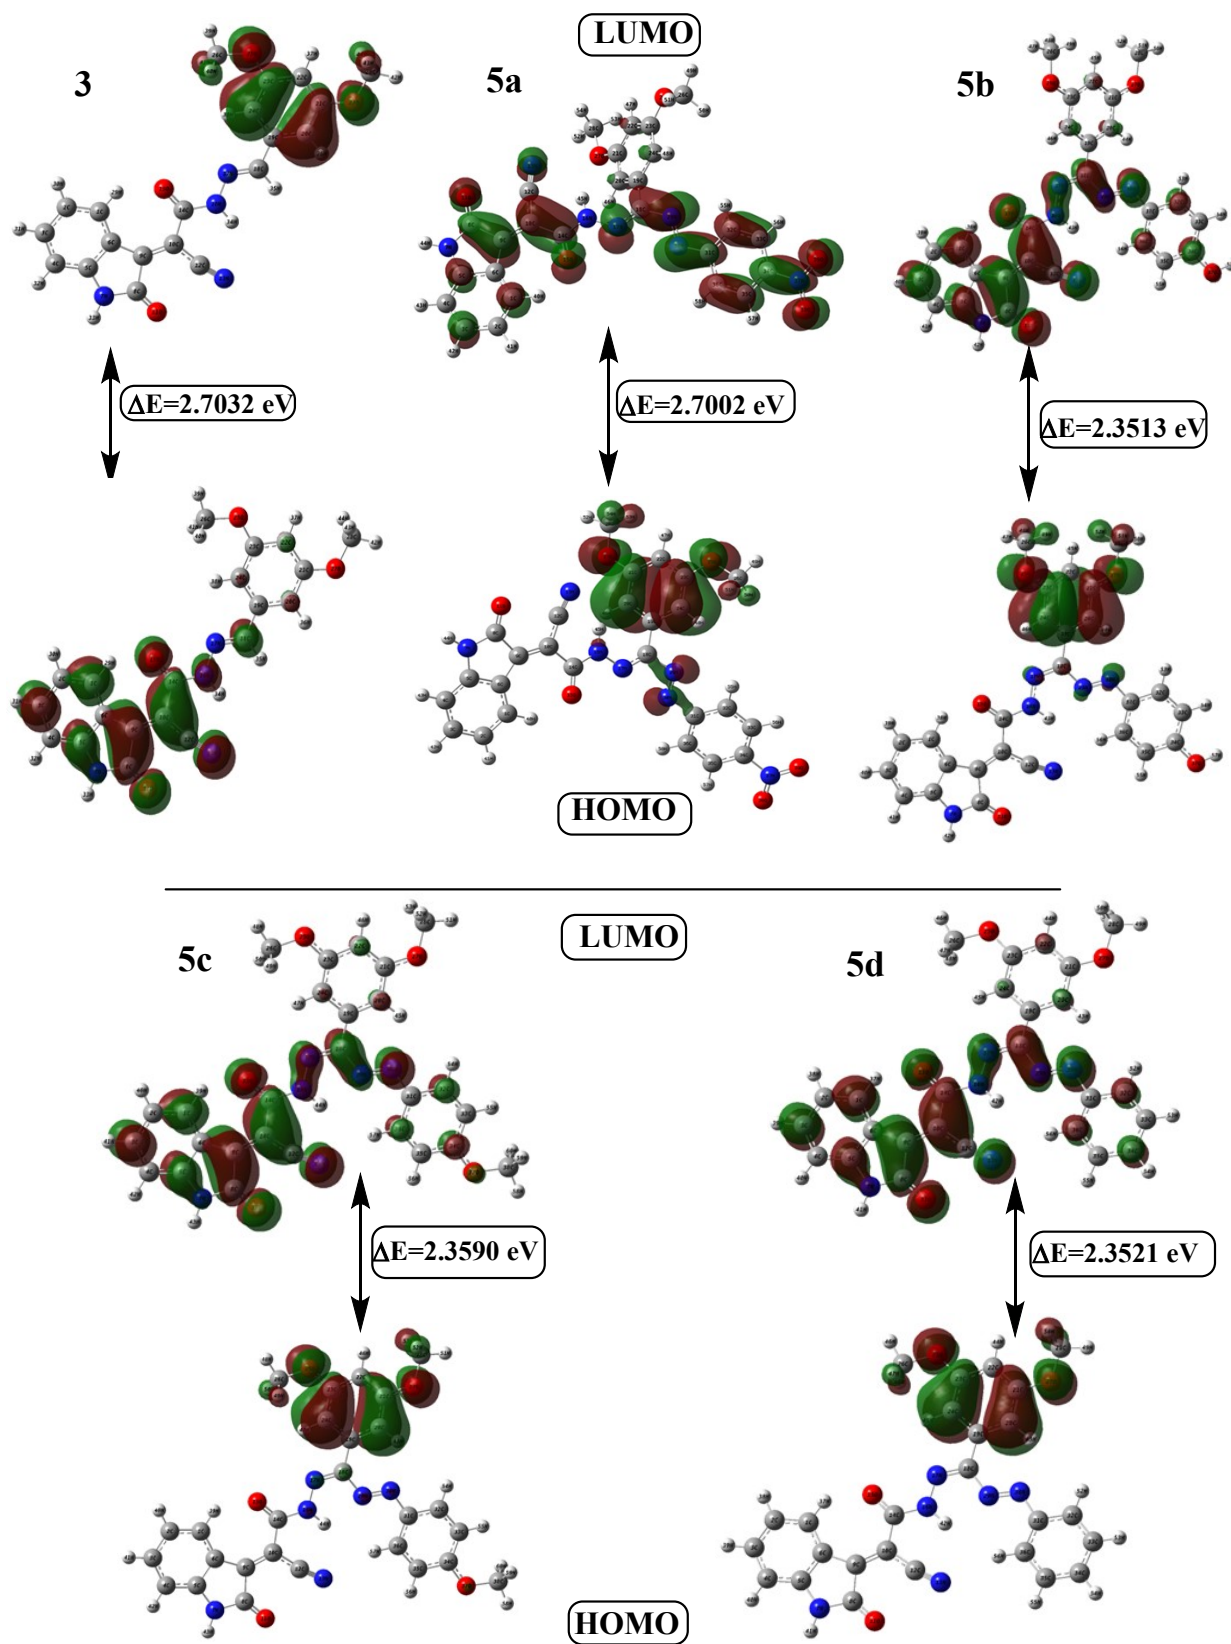

Fig. S27. The calculated HOMO, and LUMO of compounds 3, 5a-d.

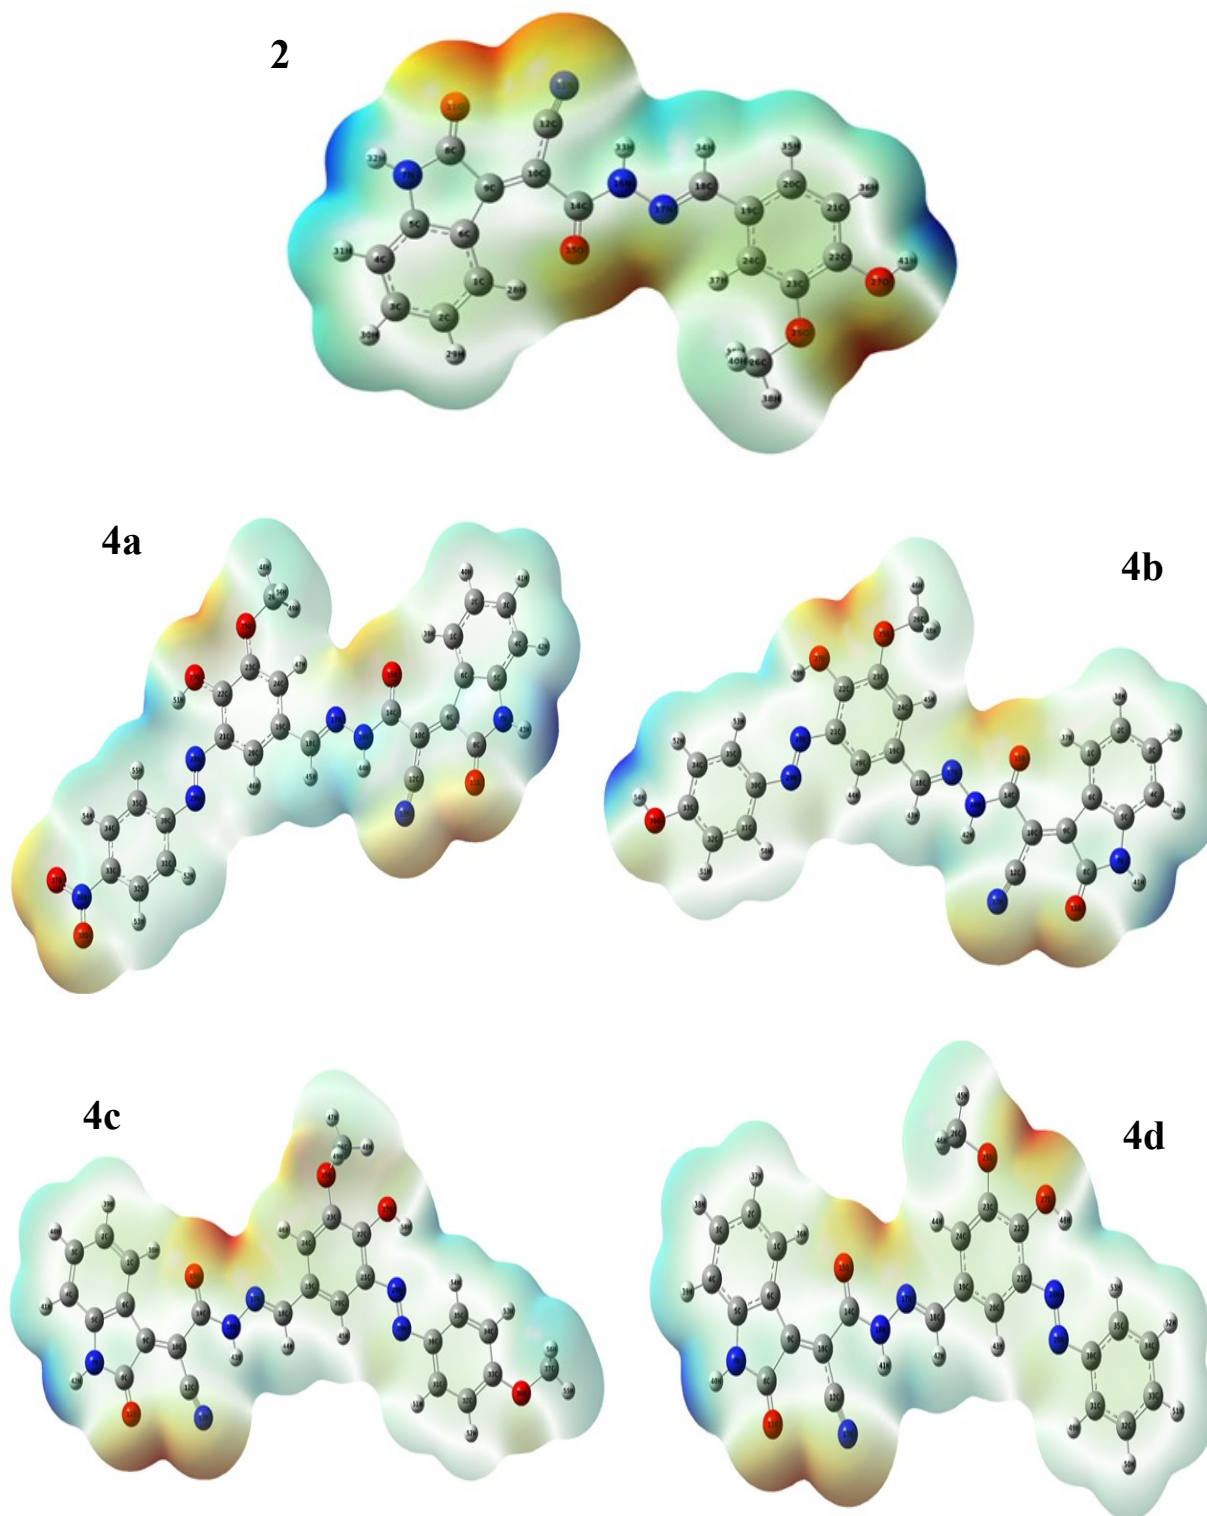

Fig. S28. MEP of Isatin compounds 2 and 4a-d.

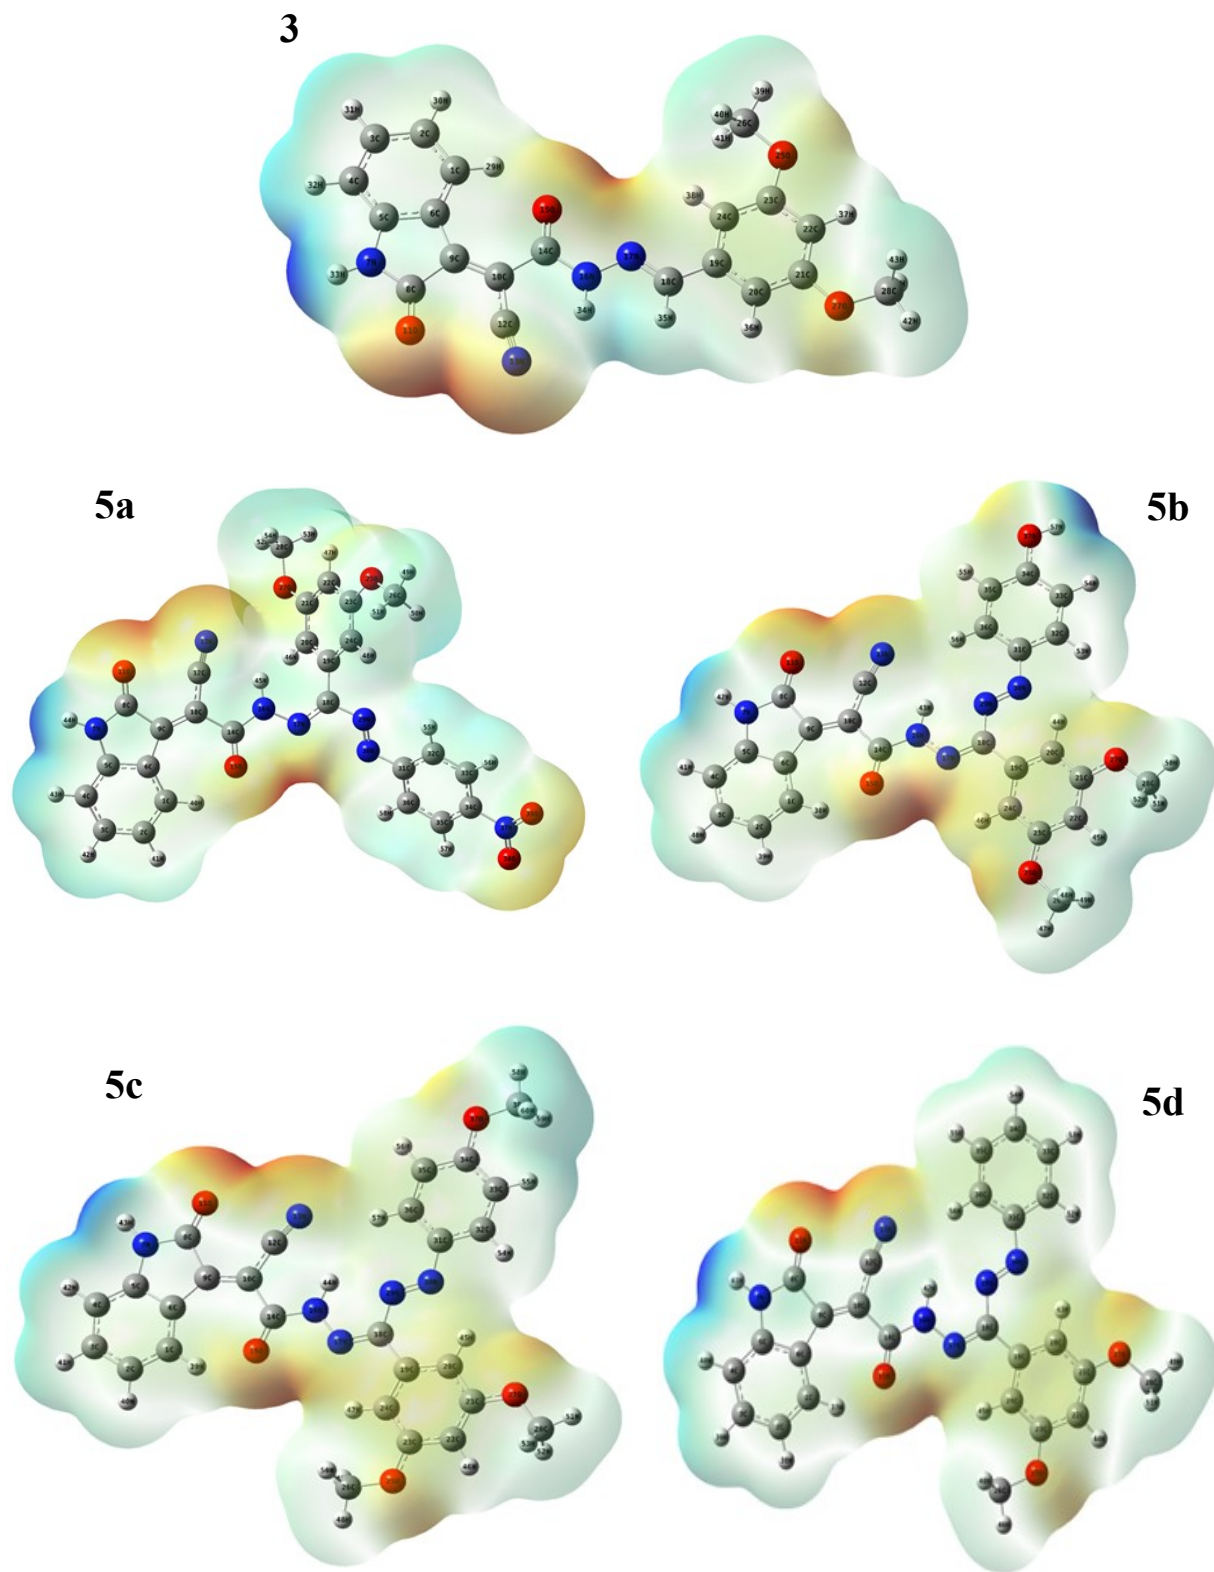

Fig. S29. MEP of Isatin compounds 3 and 5a-d.

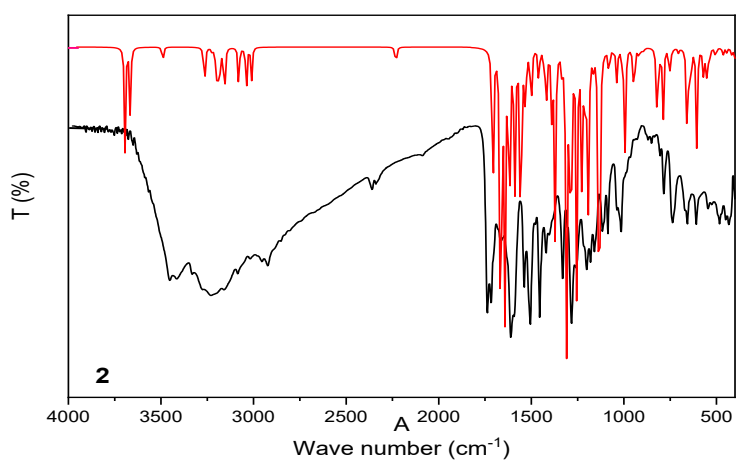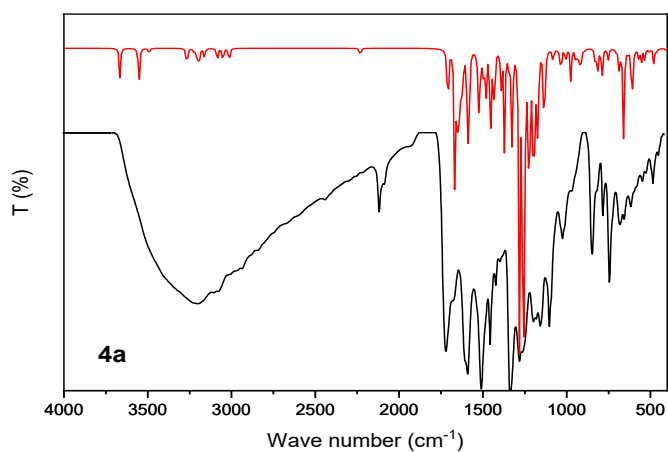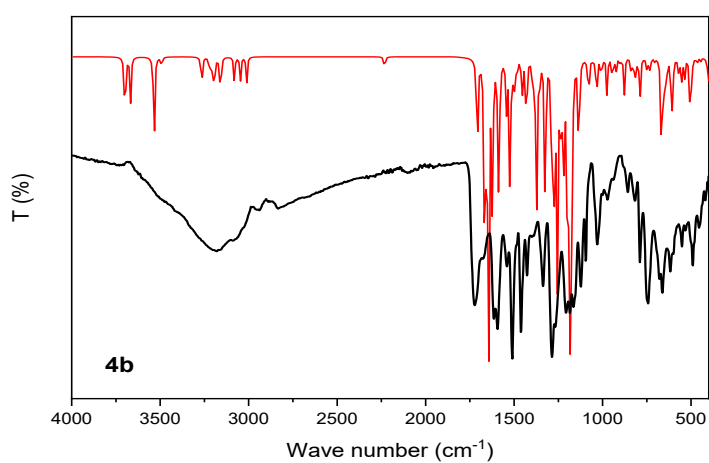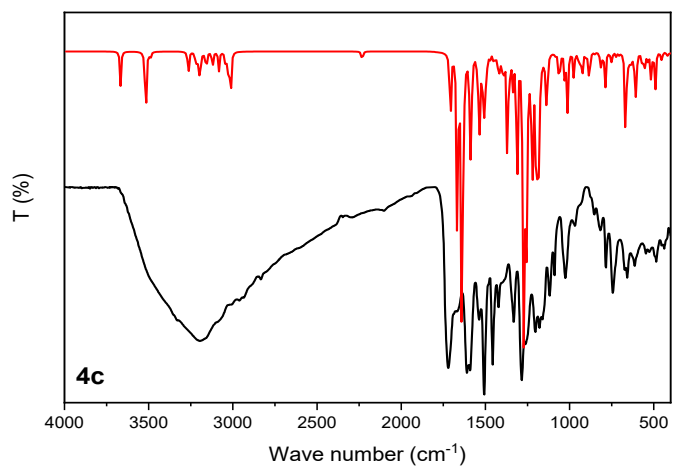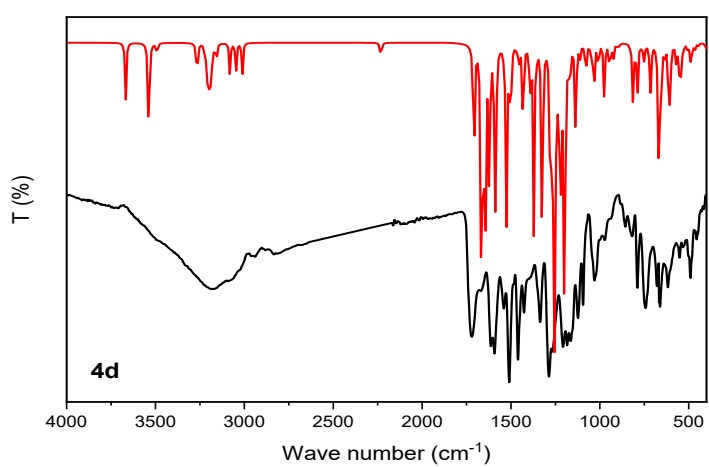

**Fig. S30.** Comparison of the computed (red color) and experimental (black color) FT-IR spectra of Isatin compounds **2**, and **4a-d**.

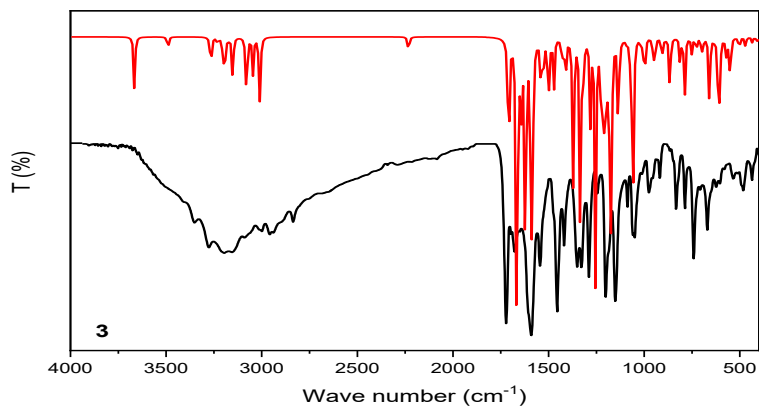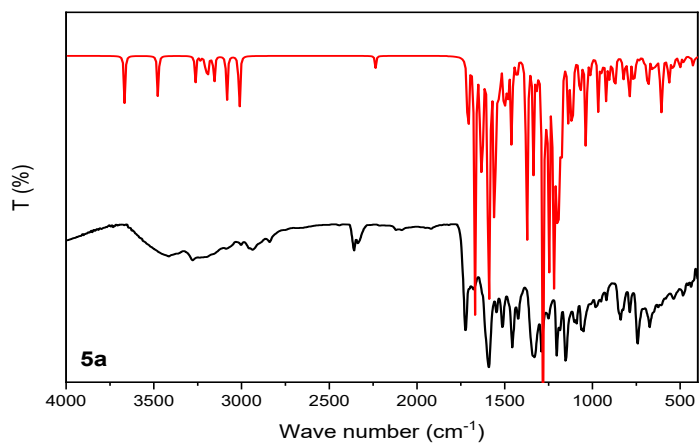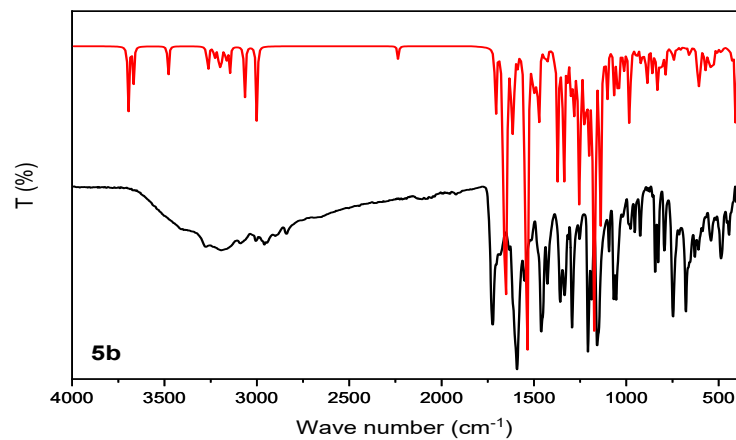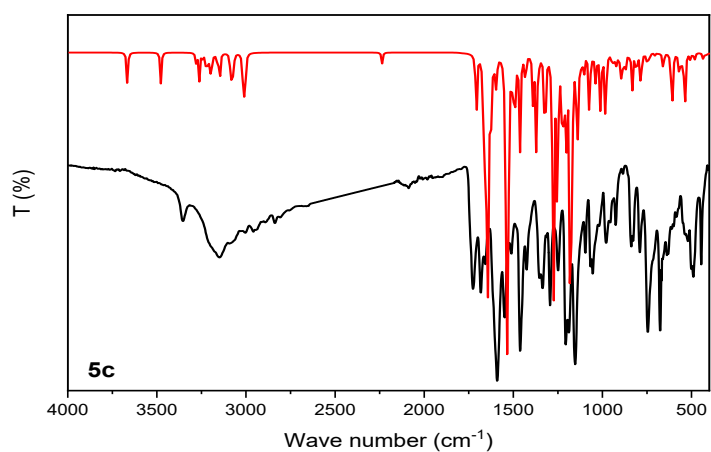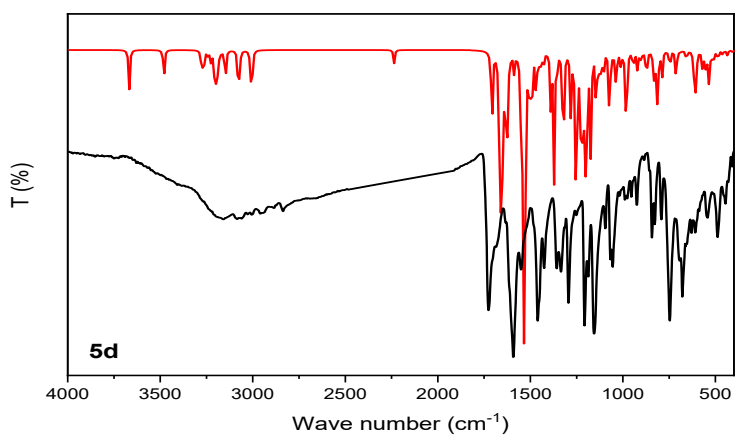

**Fig. S31.** Comparison of the computed (red color) and experimental (black color) FT-IR spectra of Isatin compounds **3**, and **5a-d**.

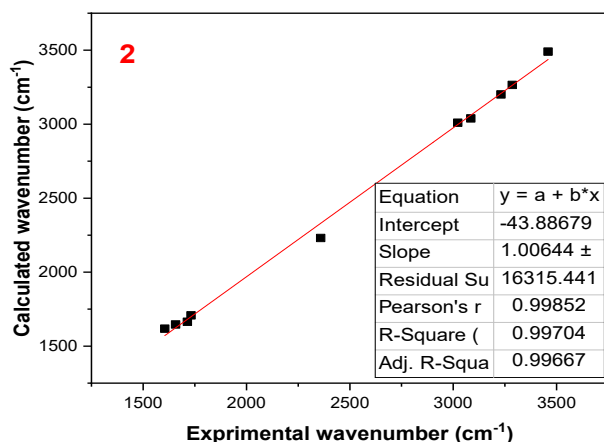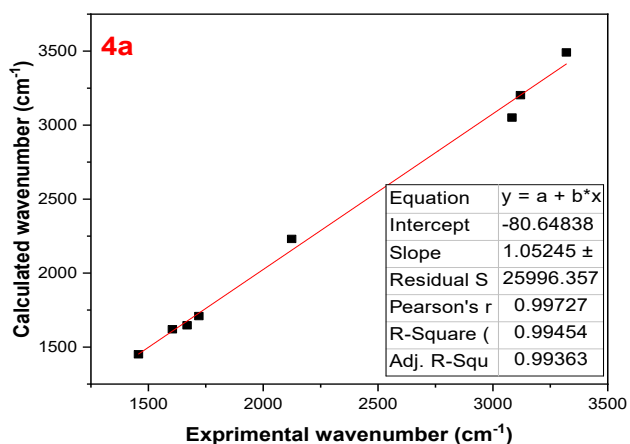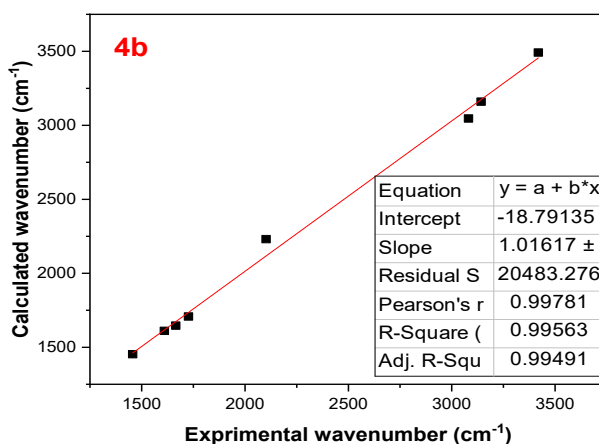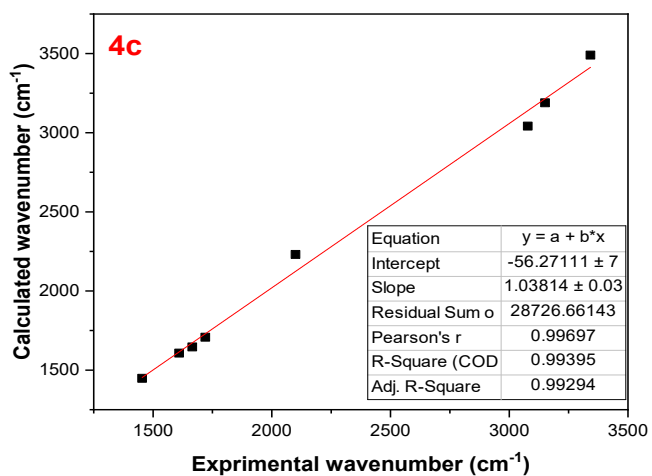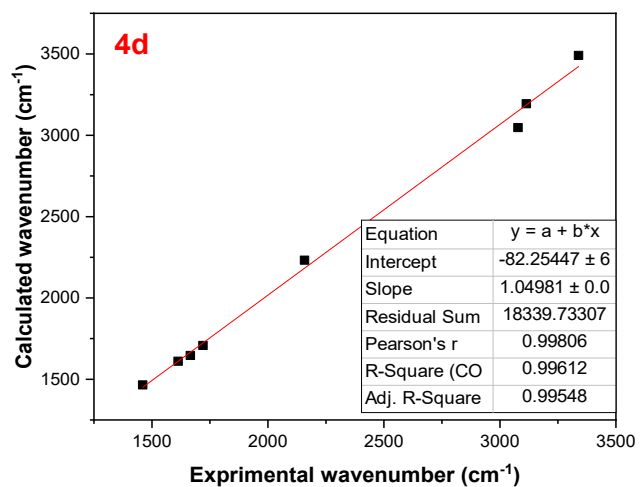

**Fig. S32.** Correlation between FT-IR spectra (calculated and observed) of Isatin compounds **2**, and **4a-d**.

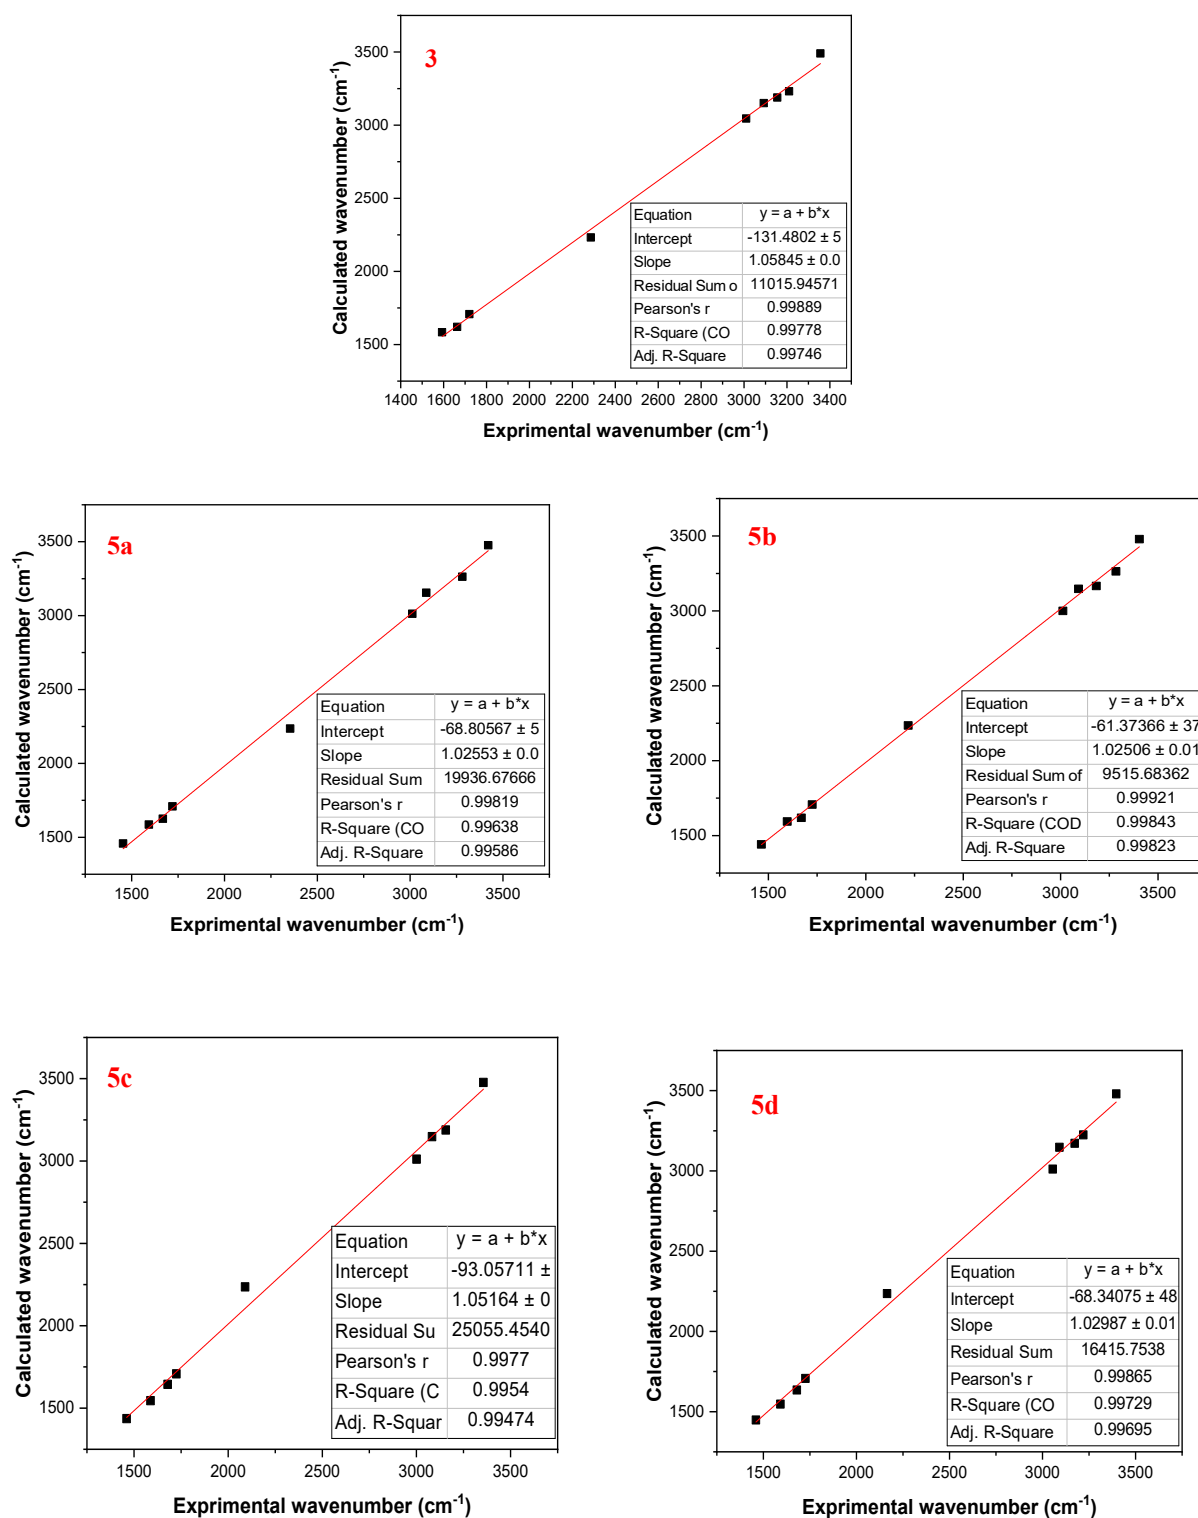

**Fig. S33.** Correlation between FT-IR spectra (calculated and observed) of Isatin compounds **3**, and **5a-d**.

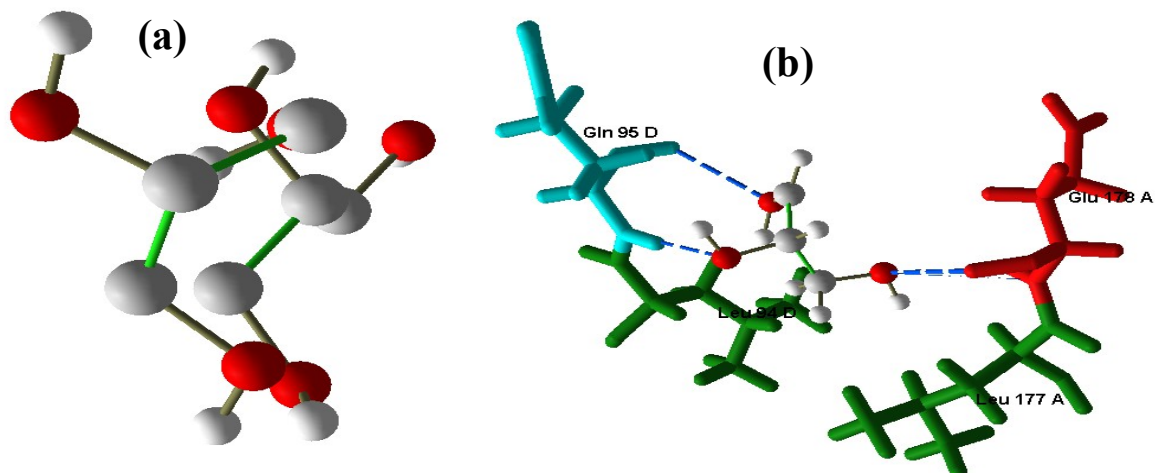

**Fig. S34.** (a) The co-crystallized and docked ligand structures in the TNF active site (PDB ID: 4RSU); (b) The native ligand's hydrogen-bonding contacts with important residues in the TNF binding site (PDB ID: 4RSU). A ball-and-stick depiction of the ligand is displayed. Hydrogen bonds formed with Gln95(D), Leu94(D), and Glu178(A) are indicated by blue dashed lines.

**Table S3.** Comparison of the experimental and calculated vibrational frequencies (cm<sup>-1</sup>) of Isatin dyes **4a-d**.

| Band assignment (cm <sup>-1</sup> ) | NH/OH Stretch |                            | CH Stretch Aromatic |                        | CH Stretch Aliphatic |                            | C≡N Stretch |             | C=O Stretch |             | C=N Stretch |             | C=C Stretch |             | N=N Stretch |             |
|-------------------------------------|---------------|----------------------------|---------------------|------------------------|----------------------|----------------------------|-------------|-------------|-------------|-------------|-------------|-------------|-------------|-------------|-------------|-------------|
|                                     | Exp.          | Cal.                       | Exp.                | Cal.                   | Exp.                 | Cal.                       | Exp.        | Cal.        | Exp.        | Cal.        | Exp.        | Cal.        | Exp.        | Cal.        | Exp.        | Cal.        |
| <b>2</b>                            | 3459.4<br>7   | 3666.1<br>2<br>3490.4<br>3 | 3286.3<br>1         | 3265.20<br><br>3201.52 | 3085.8<br>0          | 3155.2<br>1<br>3039.3<br>1 | 2359.4<br>9 | 2231.2<br>4 | 1732.7<br>3 | 1708.2<br>2 | 1657.2<br>0 | 1646.4<br>1 | 1605.1<br>4 | 1618.6<br>1 | 1541.34     | 1590.7<br>2 |
| <b>4a</b>                           | 3320.6<br>6   | 3552.4<br>0<br>3491.8<br>9 | 3120.1<br>5         | 3266.61<br><br>3237.94 | 3083.7<br>0          | 3161.0<br>5<br>3051.1<br>2 | 2124.0<br>0 | 2231.8<br>0 | 1720.8<br>1 | 1709.2<br>4 | 1668.9<br>3 | 1647.1<br>2 | 1605.8<br>4 | 1620.0<br>0 | 1457.91     | 1451.3<br>1 |
| <b>4b</b>                           | 3419.51       | 3667.17<br><br>3492.12     | 3142.1<br>2         | 3265.45<br><br>3224.82 | 3081.5<br>9          | 3156.8<br>8<br>3046.8<br>6 | 2102.9<br>0 | 2231.9<br>7 | 1727.1<br>3 | 1708.3<br>9 | 1665.4<br>3 | 1646.4<br>9 | 1610.0<br>4 | 1622.1<br>8 | 1457.91     | 1453.1<br>2 |
| <b>4c</b>                           | 3342.3<br>9   | 3517.3<br>7                | 3151.0<br>1         | 3264.54<br>3220.86     | 3078.0<br>9          | 3157.2<br>8<br>3120.81     | 2100.7<br>9 | 2231.8<br>7 | 1720.8<br>1 | 1708.2<br>5 | 1665.4<br>3 | 1646.6<br>2 | 1610.7<br>5 | 1607.6<br>3 | 1454.41     | 1448.8<br>0 |
| <b>4d</b>                           | 3339.59       | 3490.2<br>5                | 3114.5<br>7         | 3266.38<br><br>3218.64 | 3078.0<br>9          | 3157.3<br>8<br>3047.5<br>3 | 2158.9<br>8 | 2232.0<br>4 | 1720.8<br>1 | 1708.4<br>5 | 1666.1<br>3 | 1645.7<br>5 | 1613.5<br>5 | 1621.9<br>0 | 1460.72     | 1465.4<br>2 |

**Table S4.** Comparison of the experimental and calculated vibrational frequencies (cm<sup>-1</sup>) of Isatin dyes **5a-d**.

| Band assignment (cm <sup>-1</sup> ) | NH/OH Stretch |                            | CH Stretch Aromatic |                            | CH Stretch Aliphatic |                        | C≡N Stretch |             | C=O Stretch |             | C=N Stretch |             | C=C Stretch |             | N=N Stretch |             |
|-------------------------------------|---------------|----------------------------|---------------------|----------------------------|----------------------|------------------------|-------------|-------------|-------------|-------------|-------------|-------------|-------------|-------------|-------------|-------------|
|                                     | Exp.          | Cal.                       | Exp.                | Cal.                       | Exp.                 | Cal.                   | Exp.        | Cal.        | Exp.        | Cal.        | Exp.        | Cal.        | Exp.        | Cal.        | Exp.        | Cal.        |
| <b>3</b>                            | 3356.4<br>2   | 3665.7<br>7<br>3490.4<br>9 | 3210.59             | 3266.01<br><br>3202.0<br>2 | 3092.1<br>1          | 3151.63<br><br>3045.72 | 2286.58     | 223<br>2.25 | 1720<br>.82 | 1708<br>.99 | 1663<br>.33 | 1621.0<br>8 | 1593<br>.92 | 1611<br>.49 | ....        | ....        |
| <b>5a</b>                           | 3421.6<br>1   | 3665.4<br>1<br>3476.3<br>5 | 3281.40             | 3262.93<br><br>3202.81     | 3087.2<br>1          | 3157.60<br><br>3013.27 | 2354.59     | 223<br>5.84 | 1720<br>.82 | 1709<br>.15 | 1668<br>.93 | 1586.3<br>6 | 1593<br>.92 | 1611<br>.74 | 1454<br>.41 | 1458<br>.87 |
| <b>5b</b>                           | 3404.0<br>9   | 3667.5<br>9<br>3479.59     | 3284.20             | 3264.83<br><br>3201.74     | 3092.8<br>1          | 3147.01<br><br>3000.23 | 2218.06     | 223<br>4.89 | 1725<br>.58 | 1707<br>.41 | 1597<br>.54 | 1594.2<br>3 | 1669<br>.76 | 1611<br>.58 | 1463<br>.74 | 1440<br>.80 |
| <b>5c</b>                           | 3356.4<br>2   | 3665.9<br>1<br>3477.7<br>1 | 3155.9<br>1         | 3262.5<br>7<br>3201.5<br>9 | 3082.9<br>9          | 3148.12<br>3014.70     | 2089.58     | 223<br>6.03 | 1725<br>.02 | 1707<br>.56 | 1588<br>.32 | 1544.9<br>2 | 1679<br>.45 | 1611.<br>73 | 1460<br>.72 | 1436<br>.36 |
| <b>5d</b>                           | 3396.3<br>7   | 3667.5<br>0<br>3480.24     | 3219.00             | 3266.68<br><br>3196.4<br>1 | 3091.4<br>1          | 3147.48<br><br>3011.51 | 2164.70     | 223<br>6.04 | 1725<br>.58 | 1707<br>.87 | 1592<br>.61 | 1547.6<br>1 | 1680<br>.43 | 1611<br>.59 | 1460<br>.46 | 1448<br>.19 |
